## Non-motor dopamine withdrawal syndrome after surgery for Parkinson's disease: predictors and underlying mesolimbic denervation

Stéphane Thobois,<sup>1,2</sup> Claire Ardouin,<sup>3,4</sup> Eugénie Lhommée,<sup>3,4</sup> Hélène Klinger,<sup>1,2</sup> Christelle Lagrange,<sup>3,4</sup> Jing Xie,<sup>1,2</sup> Valérie Fraix,<sup>3,4</sup> Maria Clara Coelho Braga,<sup>3</sup> Rachid Hassani,<sup>3,5</sup> Andrea Kistner,<sup>3,4</sup> Alexandra Juphard,<sup>3</sup> Eric Seigneuret,<sup>4,6</sup> Stephan Chabardes,<sup>4,6</sup> Patrick Mertens,<sup>7</sup> Gustavo Polo,<sup>7</sup> Anthonin Reilhac,<sup>8</sup> Nicolas Costes,<sup>8</sup> Didier LeBars,<sup>8</sup> Marc Savasta,<sup>4</sup> Léon Tremblay,<sup>2</sup> Jean-Louis Quesada,<sup>9</sup> Jean-Luc Bosson,<sup>9</sup> Alim-Louis Benabid,<sup>6,10</sup> Emmanuel Broussolle,<sup>1,2</sup> Pierre Pollak<sup>3,4</sup> and Paul Krack<sup>3,4</sup>

1 Université Lyon I, Hospices Civils de Lyon, Hôpital Neurologique Pierre Wertheimer, Service de Neurologie C, 69003 Lyon, France

2 CNRS, UMR 5229, Centre de Neurosciences Cognitives, 69003 Lyon, France

3 Movement Disorder Unit, Department of Psychiatry and Neurology, CHU de Grenoble, Joseph Fourier University, 38043 Grenoble, France

4 INSERM, Unité 836, Grenoble Institut des Neurosciences, 38043 Grenoble, France

5 Hôpital des Spécialités, Service de Neurologie A, Rabat, Morocco

6 Neurosurgery Department, CHU de Grenoble, Joseph Fourier University, 38043 Grenoble, France

7 Université Lyon I; Hospices Civils de Lyon, Hôpital Neurologique Pierre Wertheimer, Service de Neurochirurgie A, 69003 Lyon, France

8 CERMEP—Imagerie du vivant, 69677 Bron, France

9 Centre d'Investigation Clinique, CHU Grenoble, Université Joseph Fourier, 38043 Grenoble, France

10 Clinatéc, DRT/LETI, CEA-Grenoble, 38000 Grenoble, France

Correspondence to: Paul Krack,  
Pavillon de Neurologie,  
CHU Grenoble,  
38043 Grenoble, Cedex 9, France.  
E-mail: paul.krack@ujf-grenoble.fr

Apathy has been reported to occur after subthalamic nucleus stimulation, a treatment of motor complications in advanced Parkinson's disease. We carried out a prospective study of the occurrence of apathy and associated symptoms, predictors and mechanisms in the year following subthalamic stimulation. Dopamine agonist drugs were discontinued immediately after surgery and levodopa was markedly reduced within 2 weeks. Apathy and depression were assessed monthly, using the Starkstein apathy scale and the Beck Depression Inventory. Dopamine agonists were re-introduced if patients developed apathy or depression. Preoperative non-motor fluctuations were evaluated using the Ardouin Scale. Depression, apathy and anxiety were evaluated both on and off levodopa. Analysis of predictors of apathy was performed using a Cox proportional hazard model. Twelve patients who developed apathy and a control group of 13 patients who did not underwent [<sup>11</sup>C]-raclopride positron emission tomography scanning before and after oral intake of methylphenidate. In 63 patients with Parkinson's disease treated with subthalamic stimulation, dopaminergic treatment was decreased by 82% after surgery. Apathy occurred after a mean of 4.7 (3.3–8.2) months in 34 patients and was reversible in half of these by the 12-month follow-up. Seventeen patients developed transient depression after 5.7 (4.7–9.3) months and these fell into the apathy group with one single exception. At baseline, fluctuations in depression, apathy and anxiety scores were greater in the group with apathy. Fluctuations in apathy, depression and anxiety ratings during a baseline levodopa challenge were also significant predictors of postoperative apathy in univariate analysis, but not motor and cognitive states or the level of reduction of dopaminergic medication. The multivariate

model identified non-motor fluctuations in everyday life and anxiety score during the baseline levodopa challenge as two independent significant predictors of postoperative apathy. Without methylphenidate, [ $^{11}\text{C}$ ]-raclopride binding potential values were greater in apathetic patients bilaterally in the orbitofrontal, dorsolateral prefrontal, posterior cingulate and temporal cortices, left striatum and right amygdala, reflecting greater dopamine D2/D3 receptor density and/or reduced synaptic dopamine level in these areas. The variations of [ $^{11}\text{C}$ ]-raclopride binding potential values induced by methylphenidate were greater in non-apatetic patients in the left orbitofrontal cortex, dorsolateral prefrontal cortex, thalamus and internal globus pallidus and bilaterally in the anterior and posterior cingulate cortices, consistent with a more important capacity to release dopamine. Non-motor fluctuations are related to mesolimbic dopaminergic denervation. Apathy, depression and anxiety can occur after surgery as a delayed dopamine withdrawal syndrome. A varying extent of mesolimbic dopaminergic denervation and differences in dopaminergic treatment largely determine mood, anxiety and motivation in patients with Parkinson's disease, contributing to different non-motor phenotypes.

**Keywords:** Parkinson's disease; apathy; subthalamic nucleus stimulation; dopamine; depression; anxiety

**Abbreviations:** ACC = anterior cingulate cortex; BA = Brodmann area; BAI = Beck Anxiety Inventory; BDI = Beck Depression Inventory; BP = binding potential; DBS = deep brain stimulation; DLPFC = left dorsolateral prefrontal cortex; MP = methylphenidate; OFC = orbitofrontal cortex; PCC = posterior cingulate cortex; SAS = Starkstein Apathy Scale; SPM = statistical parametric mapping; STN = subthalamic nucleus; UPDRS = Unified Parkinson's Disease Rating Scale; VAS = visual analogue scale

## Introduction

Parkinson-related apathy was initially described in the pre-levodopa (L-dopa) era using the term of lethargy (Naville, 1922). With the advent of L-dopa, an improvement in motor symptoms and an 'awakening' effect on motivation were reported (Barbeau, 1969; Cotzias *et al.*, 1969; Yahr *et al.*, 1969). Apathy is currently defined as a distinct psychiatric syndrome, characterized by a lack of motivation, manifested by diminished goal-directed cognition and behaviour, with decreased emotional involvement (Marin, 1991). Although it is a frequent symptom of major neuropsychiatric disorders (Starkstein and Leentjens, 2008; Cavanna *et al.*, 2009), current psychiatric classification systems do not provide a definition of apathy. A key feature of parkinsonian apathy is the autoactivation deficit, defined as a loss of self-driven behaviour that is reversible with external stimulation, initially described by Laplane *et al.* (1984) in the context of bilateral basal ganglia lesions (Schmidt *et al.*, 2008). A clear definition of apathy is complex, because symptoms of apathy, such as lack of interest or pleasure, may overlap with those of depression. However, several studies have implied that apathy and depression are distinct syndromes (Starkstein *et al.*, 1992; Aarsland *et al.*, 1999; Isella *et al.*, 2002; Kirsch-Darrow *et al.*, 2006; Dujardin *et al.*, 2007). Together with anxiety and depression, apathy belongs to the spectrum of neuropsychiatric symptoms of early, untreated disease, and a possible role for dopamine depletion has been discussed (Czernecki *et al.*, 2008; Schmidt *et al.*, 2008; Aarsland *et al.*, 2009; Chaudhuri and Schapira, 2009; Rodriguez-Oroz *et al.*, 2009). Apathy can be related to motor severity (Pedersen *et al.*, 2009, 2010), but this is not always the case (Isella *et al.*, 2002). The prevalence of apathy is estimated at around 40% in the general Parkinson's disease population (Starkstein *et al.*, 1992; Brown and Pluck, 2000) but it is relatively rare when dementia and depression are excluded (Pedersen *et al.*, 2009) as is the case in surgical candidates who typically present with an overall hyperdopaminergic profile (Ardouin *et al.*, 2009a). Estimating the prevalence of

apathy is difficult due to the fact that it belongs to the spectrum of non-motor fluctuations. Indeed, the commonest fluctuating non-motor symptoms are mood-related, with OFF-period anxiety, apathy and fatigue occurring in up to 75% of patients (Nissenbaum *et al.*, 1987; Witjas *et al.*, 2002; Fox and Lang, 2008). On the contrary, during ON-periods, patients with Parkinson's disease can experience an elation in mood that may be associated with alertness and euphoria (Nissenbaum *et al.*, 1987; Fox and Lang, 2008). Apathy may also be observed in other disorders such as Alzheimer's disease (Holthoff *et al.*, 2005), schizophrenia (Schlagenhauf *et al.*, 2008), fronto temporal dementia (Peters *et al.*, 2006) and progressive supranuclear palsy (Levy and Dubois, 2006). A common dysfunction of the limbic cortico-basal ganglia-thalamo-cortical loop is thought to explain the occurrence of apathy in these different pathologies (Bhatia and Marsden, 1994; Levy and Dubois, 2006). A link between apathy and dysfunction of the dopaminergic system is suggested by the model of drug addiction (Volkow *et al.*, 2009). Indeed, in this model, the dopaminergic system is downregulated, leading to apathy in periods of abstinence (Wu *et al.*, 1997; Volkow *et al.*, 2009). Conversely, the administration of a stimulant drug induces a major extracellular dopamine release, notably within the ventral striatum, which is associated with self-reports of experiencing a 'high' and euphoria (Villemagne *et al.*, 1999; Volkow *et al.*, 2009). Thus convergent evidence suggests that in Parkinson's disease, apathy is probably related to lesions of mesolimbic dopaminergic cells in the ventral tegmental area, which play an important role in motivated behaviour (Javoy Agid and Agid, 1980).

Deep brain stimulation (DBS) of the subthalamic nucleus (STN) is recognized as a major advance in the treatment of severe Parkinson's disease (Krack *et al.*, 2003). Despite its safety from a cognitive point of view, some executive functions may be affected and behavioural changes may be encountered (Ardouin *et al.*, 1999; Houeto *et al.*, 2002; Smeding *et al.*, 2006; Witt *et al.*, 2008). Psychiatric disorders reported after STN stimulation consist of such opposite conditions as apathy and depression on

the one hand, or mania and impulse control disorders on the other (Krack *et al.*, 2001, 2003; Houeto *et al.*, 2002; Romito *et al.*, 2002; Funkiewiez *et al.*, 2004; Czernecki *et al.*, 2005; Drapier *et al.*, 2006; Smeding *et al.*, 2006; Ulla *et al.*, 2006; Mallet *et al.*, 2007). Apathy has been reported as a frequent complication of STN DBS, both in the early postoperative period (Krack *et al.*, 1998, 2003; Saint-Cyr *et al.*, 2000; Houeto *et al.*, 2002; Funkiewiez *et al.*, 2004; Drapier *et al.*, 2006; Czernecki *et al.*, 2008) and in the long-term follow-up (Krack *et al.*, 2003; Troster, 2009). The precise incidence of apathy after STN stimulation is unknown and discrepancies in reported frequency reflect differences in the time of assessment, instruments used and strategy of dopaminergic treatment management (Voon *et al.*, 2006). Apathy that occurs after dopaminergic medication withdrawal allowed by surgery shows an excellent response to dopamine agonists (Czernecki *et al.*, 2008). For this reason, postoperative apathy has been considered as a reversible dopamine withdrawal state. However, it has also been suggested that STN stimulation may directly induce apathy via a limbic side effect mechanism (Fields and Troster, 2000; Drapier *et al.*, 2006; Le Jeune *et al.*, 2008, 2009; Temel *et al.*, 2009). Indeed, although postoperative apathy responds well to dopaminergic treatment (Czernecki *et al.*, 2008), dopamine withdrawal alone is not a sufficient explanation as no correlation has been found between the decrease in dopaminergic medication and the occurrence of apathy (Funkiewiez *et al.*, 2004; Drapier *et al.*, 2006; Castelli *et al.*, 2007). Thus, underlying mechanisms of postoperative apathy seem to imply complex interactions between dopaminergic meso-limbic denervation and dopaminergic treatment management. The variability in occurrence of postoperative apathy thus raises the question whether there are susceptibility factors capable of rendering some patients with Parkinson's disease more vulnerable to develop apathy than others? To address this issue, we used a clinical approach based on detailed preoperative motor, cognitive and neuropsychological evaluation of a large cohort of patients with Parkinson's disease, candidates for STN DBS, followed by monthly postoperative assessments of apathy and depression. In addition, a PET study compared the dopaminergic denervation in a subgroup of patients who developed postoperative apathy, to a control group that did not develop apathy over a 1-year follow-up period. These patients were studied with PET using [ $^{11}\text{C}$ ]-raclopride, a dopamine D2/D3 receptor ligand before and after a challenge with methylphenidate (MP), a drug that increases the synaptic concentration of dopamine by blocking the dopamine transporters, providing measures of both presynaptic endogenous dopamine release and postsynaptic dopamine receptor availability.

## Methods

### Clinical study of predictors of postoperative apathy

#### Patients

We performed a prospective study on the occurrence of apathy in the year following STN DBS in patients undergoing surgery for Parkinson's

disease in two centres. Sixty-three patients were treated with STN DBS and included in the present study. A further two patients also signed the study protocol, but in both cases a frontal haematoma related to ventriculography with reversible symptoms prevented scheduled electrode implantation, resulting in their exclusion from the study. The selection criteria were (i) clinically diagnosed Parkinson's disease; (ii) severe L-DOPA-related motor complications despite optimal adjustment of anti-parkinsonian medication; (iii) an age under 70 years; and (iv) the absence of surgical contraindications, of dementia or of major ongoing psychiatric illness, as previously described (Krack *et al.*, 2003). Specific exclusion criteria for the present study were (i) the presence of apathy before surgery as defined by a Starkstein Apathy Scale (SAS) (Starkstein *et al.*, 1992) score  $\geq 14$ ; or (ii) the presence of moderate to severe depression (score  $\geq 20$ ) on Beck Depression Inventory (BDI) (Beck *et al.*, 1996) in the ON-drug evaluation condition. The ethics committee of Grenoble University approved the study and all the patients gave written informed consent. The study protocol also included participation in a double-blind pharmacological study evaluating the effects of priribedil on parkinsonian apathy. In this ongoing study (ClinicalTrials.gov NCT01020682), patients developing apathy during the first 9 months after surgery were treated with either priribedil (a D2/D3 agonist) or placebo for 3 months; thus at the 12-month assessment, all patients had open treatment. If the BDI score was  $>20$ , patients had open treatment.

#### Procedures

Surgical procedure was as previously described (Krack *et al.*, 2003). Targeting was based on ventriculography, MRI and peroperative microrecording. Leads were implanted bilaterally in one session under local anaesthesia (DBS-3389; Medtronic, Minneapolis, MN, USA). All patients had a postoperative MRI. Leads were connected a few days later under general anaesthesia to a neurostimulator (Kinetra, Medtronic, Minneapolis, MN, USA). For the purpose of the present study, dopamine agonists were discontinued on the day of surgery in all patients, and L-DOPA treatment was reduced to the maximum extent permitted by patients' motor state within the first 2 weeks after surgery, the patient being hospitalized during this period. A minimum of  $3 \times 25$  mg of L-DOPA was maintained in all patients in order to avoid the confounding effect of the complete suppression of dopaminergic drugs on dopamine receptors availability and density (Thobois *et al.*, 2004). Adjustments of optimal stimulation parameters were performed during the 2 weeks following surgery. A monthly assessment of apathy and depression—experienced by the patients during the previous 4 weeks—was carried out by phone, using the SAS and the BDI. Dopamine agonists were re-introduced only if patients developed apathy (score  $\geq 14$  on the SAS) or depression (score  $\geq 20$  on the BDI). All patients had a full Unified Parkinson's Disease Rating Scale (UPDRS) at baseline and at 12-month follow-up, both on and off L-dopa (Krack *et al.*, 2003). Postoperatively, patients were assessed under the ON-stimulation condition. The UPDRS includes assessment of depression (item 3), apathy (item 4), activities of daily living (UPDRS II), motor signs (UPDRS III), duration of dyskinesias (item 32), disability related to dyskinesias (item 33) and duration of off-periods (item 39). Baseline and postoperative neuropsychological evaluation included the Mattis Dementia Rating Scale for global cognitive assessment, and an assessment of frontal-lobe dysfunction (Krack *et al.*, 2003). Severity and intensity of hyperdopaminergic behaviours were systematically evaluated and quantified at baseline and 12-month follow-up, using the Ardouin Scale based on a semi-structured interview, each item being rated in five points from absent (0) to severe (4). Hyperdopaminergic behavioural modifications were qualified as pathological and corresponding to behavioural



addictions if rated  $>2$  on this scale (Ardouin *et al.*, 2009a). If patients had an addiction to dopaminergic treatment (item addiction to dopamine  $\geq 2$ ) (Ardouin *et al.*, 2009a) in addition to a behavioural addiction, a diagnosis of dopamine dysregulation syndrome was made (Evans and Lees, 2004). The presence of ON-drug euphoria corresponded to a rating  $>2$  on the 'non-motor ON' item and the presence of OFF-period dysphoria corresponded to a rating  $>2$  on the 'non-motor OFF' items (Ardouin *et al.*, 2009a). The non-motor fluctuations that each patient experienced in daily life on their usual treatment were assessed by adding the two items 'non-motor ON' and 'non-motor OFF' from the Ardouin scale (Ardouin *et al.*, 2009a). The maximum possible score for non-motor fluctuations in this scale is 8 and a score of  $>2$  was taken as indicative of the presence of clinically relevant non-motor fluctuations. In addition, at baseline, a non-motor assessment comprising an evaluation of depression (BDI) (Beck *et al.*, 1996), apathy (SAS) (Starkstein *et al.*, 1992), anxiety (Beck Anxiety Inventory, BAI) (Beck *et al.*, 1988) and the Norris visual analogue scale (VAS) asthenia subscore (Norris, 1971; Guelfi, 1989) was added during the L-dopa test in both ON and OFF drug conditions. Using these scales in OFF and ON conditions, the patients were asked to answer in function of how they really felt at the moment of the examination (Czernecki *et al.*, 2002). Changes in L-dopa and dopamine agonists were expressed as the total L-dopa-equivalent daily dosage (Thobois, 2006).

### Statistical analysis of clinical data

Analysis was by intention to treat including all implanted patients even when dopamine agonists could not be discontinued or if L-dopa could not be decreased. All data analyses were performed using Stata (version 10.1). Data were summarized in terms of size and frequency for categorical data and by mean scores  $\pm$  standard deviation for quantitative data. Student's *t*-test was used to compare continuous data. Mann–Whitney or Wilcoxon tests were applied for non-Gaussian assumption. Independence between qualitative parameters was assessed using either the chi-square test or with Fisher's exact test. Univariate and multivariate analyses were performed using stepwise Cox proportional hazard models with forward selection and presented as hazard ratios with 95% confidence intervals. For all Cox models, proportional hazards assumption was validated on the basis of Schoenfeld residuals. The Kaplan–Meier method was used to generate survival curves. Survival time was summarized by median (25th and 75th percentile) and compared using the log-rank test. *P*-values  $<0.05$  were considered statistically significant.

## PET study

### Patients

Evaluation of motor (UPDRS III) and non-motor symptoms (SAS, BDI, BAI) reflect the chronic state ON stimulation and minimal drug treatment at the time of the PET study. The control group consisted of patients who had not developed apathy at the 12-month postoperative control. [ $^{11}\text{C}$ ]-raclopride PET scan was performed as soon as the diagnosis of apathy was confirmed for the apathetic group ( $n=12$ ;  $6.8 \pm 3.4$  months after surgery) and before a dopamine agonist treatment targeting the lack of motivation was initiated. For the non-aphathetic group, PET scan was made at the end of the follow-up ( $n=13$ ; 12 months) if no apathy was disclosed.

### PET protocol

All patients were OFF-drug on the day of PET study for at least 12 h before the scan acquisition, with stimulation 'ON'. PET scans were

performed as previously described (Thobois *et al.*, 2004). All patients underwent two [ $^{11}\text{C}$ ]-raclopride PET scans on the same day. The first one was performed without any treatment. The second one was performed 2 h after patients received an oral dose of 0.5 mg/kg MP, a drug that increases the synaptic concentration of dopamine by blocking dopamine transporters (Volkow *et al.*, 1998). Before the second PET, the clinical effects of MP were assessed using a timed tapping test for the motor consequences (Nutt *et al.*, 2007) and the Norris VAS asthenia subscore (Norris, 1971; Guelfi, 1989) for the psychotropic changes. The mean ( $\pm$ SD) [ $^{11}\text{C}$ ]-raclopride injected activity for the non-aphathetic patients was  $210.5 \pm 38$  milli Becquerel (MBq) (baseline) and  $219.8 \pm 38$  MBq (after MP), and that for the apathetic patients was  $208.3 \pm 36$  MBq (baseline) and  $203.1 \pm 29$  MBq (after MP). The mean dose of MP was  $35.5 \pm 6$  mg (range: 25–45) for the apathetic patients and  $36.2 \pm 8$  mg (range: 30–55) for the non-aphathetic patients. This dose is known to be sufficient to block  $>50\%$  of the dopamine transporter after 120 min (Volkow *et al.*, 2009). Images were reconstructed as previously reported (Thobois *et al.*, 2004).

## Image analysis

### Regions of interest analysis

Briefly, regions of interest ( $10 \times 30$  mm) were placed along the axis of each putamen and on each caudate nucleus head ( $10 \times 10$  mm) on five consecutive planes. The non-specific background activity was averaged from a cerebellar elliptical region of interest of  $5 \pm 0.5$  cm<sup>3</sup> (Thobois *et al.*, 2004). The [ $^{11}\text{C}$ ]-raclopride binding potential (BP) ( $B_{\text{max}}/K_d$ ) was determined from the distribution volume, evaluated using a graphical approach and a tissue input function (Logan *et al.*, 1996).

### Statistical parametric mapping analysis

Image and statistical analysis were performed in MATLAB 6 (Math Works, Natick, MA, USA) using software for statistical parametric mapping (SPM 2 Wellcome Department of Cognitive Neurology, MRC Cyclotron Unit, London, UK). Voxel-based parametric images of BP were generated with the same reference region as that for the region of interest approach. BP images were spatially normalized and smoothed as previously described (Thobois *et al.*, 2004).

### Statistical analysis of PET data

Categorical comparisons of mean [ $^{11}\text{C}$ ]-raclopride voxel-based BP values between both groups of patients with Parkinson's disease before MP were made using appropriately weighted categorical contrasts ( $\text{BP-Raclo}_{\text{apathetic}} - \text{BP-Raclo}_{\text{nonapathetic}}$ ;  $\text{BP-Raclo}_{\text{nonapathetic}} - \text{BP-Raclo}_{\text{apathetic}}$ ) to generate SPMs for both increases and decreases in [ $^{11}\text{C}$ ]-raclopride BP values on a voxel-by-voxel basis. In addition, variations of the mean [ $^{11}\text{C}$ ]-raclopride voxel-based BP values before and after MP ( $=\Delta$ MP) were compared in apathetic and non-aphathetic patients [ $(\text{BP-Raclo}_{\text{apathetic}} - \text{BP-Raclo-MP}_{\text{apathetic}}) - (\text{BP-Raclo}_{\text{nonapathetic}} - \text{BP-Raclo-MP}_{\text{nonapathetic}})$ ;  $(\text{BP-Raclo}_{\text{nonapathetic}} - \text{BP-Raclo-MP}_{\text{nonapathetic}}) - (\text{BP-Raclo}_{\text{apathetic}} - \text{BP-Raclo-MP}_{\text{apathetic}})$ ]. Finally, using a covariate-only model, covariations of the tracer uptake with the severity of the apathy using the Starkstein apathy score were performed. These analyses were limited to the limbic regions (pre-frontal, temporal, cingulate cortices) and basal ganglia using appropriate masks created in MATLAB using VoiTool. The contrasts were used to derive between conditions Z-scores on a voxel-by-voxel basis using the general linear model (Friston *et al.*, 1995). Only voxels surviving an uncorrected threshold of  $P \leq 0.001$  and a cluster of  $\geq 10$  voxels

were considered significant. These voxels were rendered on a single subject stereotactically normalized brain MRI and localized using their coordinates in Montreal Neurological Institute space.

## Results

### Clinical study

#### Baseline evaluation

There was no difference in the baseline characteristics, the usual motor and neuropsychological evaluations and treatment of the patient group that developed apathy during the 12-month follow-up (Apathy group) and those of the patient group that did not (Non-apathy Group) (Table 1). Four patients fulfilled criteria for dopamine dysregulation syndrome at baseline. Seventeen other patients had one or several behavioural addictions, but without compulsive dopamine replacement consumption. Non-motor fluctuations in everyday life (Table 1) as well as acute fluctuations of asthenia VAS, depression, anxiety and apathy during the L-DOPA challenge (Table 2) were found to be more severe in the Apathy Group.

#### Changes in medication

At baseline the total daily dose of L-dopa equivalent was  $1617 \pm 818$  mg and 59 patients were treated with a dopamine agonist. One month after surgery (M1), the total L-dopa equivalent daily dosage was decreased to  $288 \pm 325$  mg (–82%). In four patients, discontinuation of dopamine agonists proved impossible

due to ensuing restless legs syndrome. At 12 months, 23 patients were again on agonist medication and the total L-dopa equivalent daily dosage was  $440 \pm 395$  mg (–73%). There was no difference in the postoperative decrease of dopaminergic treatment between the Apathy and Non-apathy groups (data not shown).

#### Outcome

Evaluation at 12 months in the 63 patients showed an improvement in the UPDRS motor score from  $36.3 \pm 12.5$  at baseline OFF drug to  $19.9 \pm 13.6$  (–45.2%) in the OFF-drug ON-stimulation condition at 12 months, and no change in the ON drug condition ( $10 \pm 6.5$  versus  $11 \pm 7.5$ ). Duration of dyskinesias improved from  $1.51 \pm 0.97$  to  $0.47 \pm 0.74$  (–69%), disability from  $1.27 \pm 1.08$  to  $0.26 \pm 0.54$  (–80%) and duration of OFF periods from  $1.65 \pm 0.74$  to  $0.39 \pm 0.75$  (–76%). There was no difference in the improvement of motor fluctuations and dyskinesias between the apathy and no-apathy groups (data not shown). Dopamine dysregulation syndrome disappeared in all four patients and behavioural addictions disappeared in all 17 patients who displayed pathological behaviours at baseline.

#### Complications

Four patients had transient symptomatic contusion (psychosis  $n=1$ , somnolence  $n=1$ , stereotypies  $n=1$ , confusion  $n=1$ ) and one had asymptomatic contusion along the trajectory of electrodes on postoperative MRI. Four patients had transient postoperative confusion ( $n=1$ ) or behavioural changes without MRI-confirmed contusion (psychosis  $n=2$ , emotional lability  $n=1$ ). Transient general health complications occurred in four patients (urinary

**Table 1** Baseline characteristics, motor and non-motor evaluation of the total cohort split up for the apathy and non-apathy groups

| Parameters                                  | Total population (n = 63)   | Patients with no subsequent apathy: Non-apathy group n = 29 | Patients with subsequent apathy: Apathy group n = 34 | P                   |
|---------------------------------------------|-----------------------------|-------------------------------------------------------------|------------------------------------------------------|---------------------|
| Age                                         | $57.8 \pm 7.2$ [30.4; 69.5] | $58.1 \pm 4.9$ [47.3; 69.5]                                 | $57.5 \pm 8.7$ [30.4; 69.5]                          | 0.9450 <sup>a</sup> |
| Duration of disease                         | $10.5 \pm 3.1$ [5; 19]      | $10.3 \pm 2.6$ [5; 15]                                      | $10.6 \pm 3.4$ [5; 19]                               | 0.6361 <sup>b</sup> |
| Age at diagnosis                            | $47.3 \pm 7.3$ [18; 62]     | $47.8 \pm 5.2$ [36; 58]                                     | $46.9 \pm 8.8$ [18; 62]                              | 0.8037 <sup>a</sup> |
| Sex (% male)                                | 63.5% (40)                  | 69% (20)                                                    | 58.8% (20)                                           | 0.442 <sup>c</sup>  |
| Depression (UPDRS Part I, item 3)           | $0.46 \pm 0.71$ [0; 4]      | $0.34 \pm 0.55$ [0; 2]                                      | $0.56 \pm 0.82$ [0; 4]                               | 0.2818 <sup>a</sup> |
| Apathy (UPDRS Part I, item 4)               | $0.21 \pm 0.48$ [0; 2]      | $0.21 \pm 0.49$ [0; 2]                                      | $0.21 \pm 0.48$ [0; 2]                               | 0.9750 <sup>a</sup> |
| Activities of daily living OFF drug, n = 62 | $20.5 \pm 6.1$ [4; 36]      | $20 \pm 6.5$ [4; 28]                                        | $21 \pm 5.9$ [9; 36]                                 | 0.5244 <sup>b</sup> |
| Activities of daily living ON drug          | $4.6 \pm 3.4$ [0; 17]       | $4 \pm 3.2$ [0; 14]                                         | $5.1 \pm 3.5$ [0; 17]                                | 0.2170 <sup>a</sup> |
| Duration of dyskinesia                      | $1.51 \pm 0.97$ [0; 4]      | $1.38 \pm 0.98$ [0; 4]                                      | $1.62 \pm 0.95$ [0; 4]                               | 0.3326 <sup>b</sup> |
| Disability of dyskinesias                   | $1.27 \pm 1.08$ [0; 4]      | $1.24 \pm 1.02$ [0; 3]                                      | $1.29 \pm 1.14$ [0; 4]                               | 0.9370 <sup>a</sup> |
| Duration of OFF periods                     | $1.65 \pm 0.74$ [0; 3]      | $1.55 \pm 0.69$ [0; 3]                                      | $1.73 \pm 0.79$ [1; 3]                               | 0.3330 <sup>b</sup> |
| Mattis Dementia Rating Scale                | $139.1 \pm 3.7$ [128; 144]  | $138.8 \pm 4.3$ [128; 144]                                  | $139.4 \pm 3.2$ [133; 144]                           | 0.8406 <sup>a</sup> |
| Frontal lobe function                       | $41.8 \pm 6.5$ [24.5; 50]   | $43.1 \pm 6.2$ [26.9; 50]                                   | $40.7 \pm 6.7$ [24.5; 50]                            | 0.0990 <sup>a</sup> |
| Non-motor fluctuations                      | 46.0% (29)                  | 31% (9)                                                     | 58.8% (20)                                           | 0.027 <sup>c</sup>  |
| Total L-dopa dose                           | $1343 \pm 805$ (300; 3150)  | $1272 \pm 606$ (400; 2750)                                  | $1402 \pm 947$ (300; 3150)                           | 0.9505 <sup>a</sup> |
| Total dopamine agonist equivalent           | $274 \pm 141$ (0; 600)      | $265 \pm 161$ (0; 600)                                      | $282 \pm 123$ (0; 600)                               | 0.6435 <sup>b</sup> |
| Hoehn and Yahr ON stage                     | $1.70 \pm 0.70$ (0; 3)      | $1.74 \pm 0.71$ (0; 3)                                      | $1.66 \pm 0.69$ (0; 3)                               | 0.6558 <sup>b</sup> |
| Hoehn and Yahr OFF stage                    | $2.78 \pm 0.80$ (0; 5)      | $2.76 \pm 0.73$ (0; 5)                                      | $2.79 \pm 0.87$ (0; 5)                               | 0.8627 <sup>b</sup> |

Results are given as mean  $\pm$  SD [minimum maximum] for quantitative data, as percentage and size for qualitative data.

a Mann–Whitney.

b *t*-test.

c Chi-square.

**Table 2** Comparison of the motor and non-motor evaluations during the L-dopa test at baseline between the apathy and non-apathy groups

|                   | Patients with no subsequent apathy:<br>Non-apathy group n=29 |              |                 |                     | Patients with subsequent apathy:<br>Apathy group n=34 |              |                 |                     | Delta OFF–ON<br>Apathy versus<br>Non-apathy<br>P |
|-------------------|--------------------------------------------------------------|--------------|-----------------|---------------------|-------------------------------------------------------|--------------|-----------------|---------------------|--------------------------------------------------|
|                   | OFF<br>L-dopa                                                | ON<br>L-dopa | Delta<br>OFF–ON | P                   | OFF<br>L-dopa                                         | ON<br>L-dopa | Delta<br>OFF–ON | P                   |                                                  |
| SAS apathy        | 8.9±5.1                                                      | 5.5±3.2      | 3.3±4.7         | ≤0.001 <sup>a</sup> | 12.8±7                                                | 6.5±3.6      | 6.3±6.5         | ≤0.001 <sup>a</sup> | 0.0450 <sup>b</sup>                              |
| VAS asthenia      | 35.6±14.6                                                    | 17.6±12.9    | 18.0±20.9       | ≤0.001 <sup>a</sup> | 46±15.6                                               | 18.6±13.1    | 27.3±19         | ≤0.001 <sup>c</sup> | 0.0685 <sup>d</sup>                              |
| BDI depression    | 9.9±6                                                        | 7.7±5.4      | 2.1±4.4         | 0.0056 <sup>a</sup> | 14.6±7                                                | 9.4±6        | 5.1±6.7         | ≤0.001 <sup>a</sup> | 0.0180 <sup>b</sup>                              |
| BAI anxiety       | 12.9±8.2                                                     | 9.4±10.7     | 3.5±5.8         | 0.0056 <sup>a</sup> | 18.2±10.6                                             | 9.1±9.9      | 9.1±10.1        | ≤0.001 <sup>a</sup> | 0.0192 <sup>b</sup>                              |
| UPDRS motor score | 36.3±10.7                                                    | 9.9±6.5      | 26.4±8.6        | ≤0.001 <sup>a</sup> | 36.2±14.1                                             | 10.2±6.6     | 26.0±10.4       | ≤0.001 <sup>a</sup> | 0.8770 <sup>d</sup>                              |

n=32

Results are expressed as mean ± SD.

a Wilcoxon test.

b Mann–Whitney test.

c Paired Student *t*-test.

d Unpaired Student *t*-test.

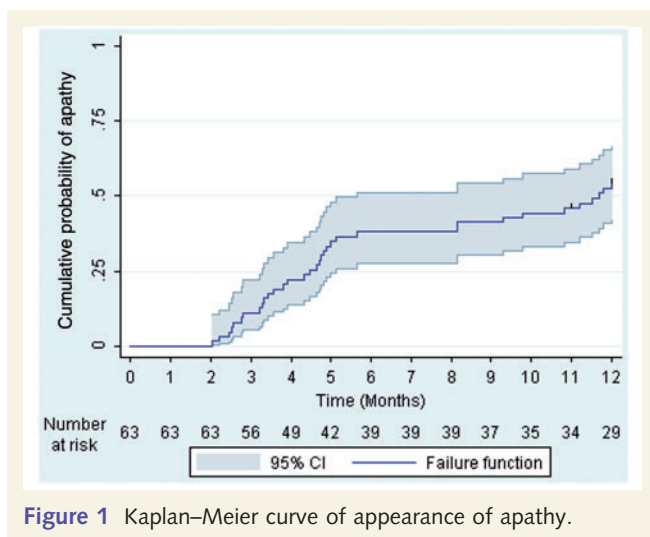

**Figure 1** Kaplan–Meier curve of appearance of apathy.

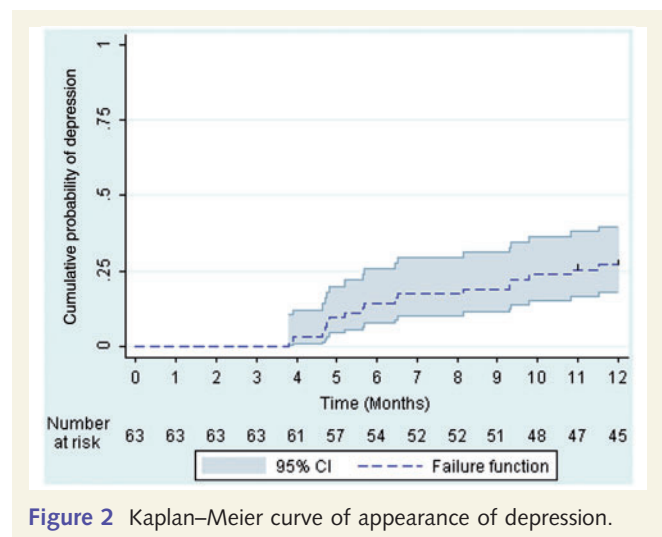

**Figure 2** Kaplan–Meier curve of appearance of depression.

retention  $n=1$ , dysuria  $n=1$ , akinetic crisis complicated by aspiration pneumonia and cardiorespiratory arrest requiring reanimation  $n=1$ , gastroenteritis  $n=1$ ). Electrodes were misplaced in one patient. Electrode migration ( $n=1$ ) and cable fracture necessitated re-operation ( $n=1$ ). Infections required temporary removal of the subcutaneous material ( $n=1$ ) or removal of the subcutaneous and intracerebral material still effective at 12 months ( $n=1$ ). Other side effects were worsening of dysarthria ( $n=16$ ), freezing of gait ( $n=6$ ), worsening of falls ( $n=5$ ), worsening of restless legs syndrome ( $n=6$ ) and eyelid apraxia ( $n=3$ ). Apathy and depression are reported above. One patient displayed psychotic symptoms 6 months after surgery on reintroduction of a dopamine agonist for his apathy. One patient, whose dopamine agonists could not be stopped because of the unmasking of a severe restless legs syndrome, developed transient hypomania.

### Monthly follow-up of apathy and depression

The median duration of apathy-free survival in 63 patients was 11.5 (4.5–12) months [median (25;75 percentile)] (Fig. 1).

Thirty-four patients developed apathy after 4.7 (3.3–8.2) months, from 2 to 12 months. At 12 months, 17 of the 34 patients were no longer apathetic. Depression (BDI score  $\geq 20$ ) occurred in 17 patients after 5.7 (4.7–9.3) months, from 3.8 to 11.5 months. The median duration of depression-free survival in the 63 patients was 12 (10.8–12) months (Fig. 2). Depression was transient in all patients with a maximum duration of 4 months. Out of 17 depressive patients, 16 were also in the Apathy Group and only 1 patient with depression was in the Non-Apathy Group ( $P < 0.0003$ ). Two patients attempted suicide (one of them following an infection requiring explantation of the neurostimulator and electrodes).

### Analysis of predictors of apathy

In the univariate analysis, non-motor fluctuations in everyday life  $>2/8$  (Ardouin scale) and acute fluctuations measured by the VAS and by specific scales for apathy (SAS), depression (BDI) and anxiety (BAI) during the L-DOPA test proved to be significant

**Table 3 Predictors of apathy: univariate analysis**

| Parameters <i>n</i> = 63                                             | Hazard ratio | Confidence interval 95% | <i>P</i> |
|----------------------------------------------------------------------|--------------|-------------------------|----------|
| Delta apathy (SAS) per unit                                          | 1.095        | [1.036; 1.157]          | 0.001    |
| Delta depression (BDI) per unit                                      | 1.073        | [1.023; 1.126]          | 0.004    |
| Delta anxiety (BAI) per unit                                         | 1.051        | [1.016; 1.088]          | 0.004    |
| Delta VAS–Asthenia per unit                                          | 1.024        | [1.005; 1.043]          | 0.013    |
| Delta UPDRS III <i>n</i> = 61 per unit                               | 0.989        | [0.949; 1.031]          | 0.617    |
| Non-motor ON yes versus no                                           | 2.417        | [0.993; 5.883]          | 0.052    |
| Non-motor OFF yes versus no                                          | 1.409        | [0.610; 3.250]          | 0.422    |
| Non-motor fluctuations yes versus no                                 | 2.515        | [1.244; 5.085]          | 0.010    |
| Decrease in total L-dopa equivalent per 100 mg of L-dopa equivalent  | 1.03         | [0.98; 1.08]            | 0.205    |
| Total preoperative L-dopa equivalent per 100 mg of L-dopa equivalent | 1.0278       | [0.9828; 1.0749]        | 0.229    |
| Mattis Dementia Rating Scale at baseline per unit                    | 1.057        | [0.959; 1.164]          | 0.266    |
| UPDRS III Off at baseline <i>n</i> = 61 per unit                     | 0.992        | [0.960; 1.025]          | 0.634    |

Univariate Cox proportional hazard model. Delta refers to fluctuations at baseline between OFF-drug and ON-drug conditions assessed during a L-dopa challenge. The hazard ratio of 1.1 for delta apathy indicates that for any increase of one point on the Starkstein apathy score at baseline OFF-drug compared with baseline ON-drug condition, the risk of developing apathy will increase by 10%. A delta of 5 points on the apathy score will lead to a 1.6-fold, a delta of 10 points to a 2.5-fold increase in postoperative apathy. The presence of non-motor fluctuations at baseline corresponds to 2.5-fold increases of the risk of developing apathy.

**Table 4 Predictors of apathy: multivariate analysis**

| Parameters                           | Hazard ratio | Confidence Interval 95% | <i>P</i> |
|--------------------------------------|--------------|-------------------------|----------|
| Delta anxiety (BAI) per unit         | 1.054        | [1.019; 1.090]          | 0.002    |
| Non-motor fluctuations yes versus no | 2.754        | [1.348; 5.626]          | 0.005    |

Multivariate stepwise Cox proportional hazard model with forward selection. Note that all significant variables in the univariate analysis have been integrated in the multivariate analysis.

predictors of apathy, whereas L-DOPA response of motor signs, total dopaminergic treatment at baseline and decrease in dopaminergic treatment after surgery did not (Table 3). A multivariate analysis integrated non-motor fluctuations in everyday life >2/8 (Ardouin scale); acute fluctuations of VAS, SAS, BDI and BAI during the L-DOPA test; L-DOPA response of motor signs; total dopaminergic treatment at baseline and decrease in agonist dosage; decrease in L-dopa dosage and decrease in total L-dopa equivalent dosage after surgery; and non-motor ON (Ardouin scale) and non-motor OFF (Ardouin scale). Non-motor fluctuations of the Ardouin scale and fluctuations in BAI emerged from among these as predictors of apathy (Table 4).

## PET study

### Clinical characteristics of the patients

No difference was noted in baseline characteristics between apathetic and non-apathetic patients before surgery (Table 5). Non-motor fluctuations were present in both groups with a trend for higher fluctuations and higher OFF-drug scores in the apathetic group, but this did not reach significance.

At the time of the PET, dopamine agonists were stopped in both groups (100% reduction) and L-dopa was reduced by 88% in non-apathetic patients versus 89.7% in apathetic patients. In addition to the higher scores on the SAS, apathetic patients had higher

scores on the BAI and on the BDI than the non-apathetic ones (Table 5).

### Clinical evaluation after MP intake

After MP intake, both apathetic and non-apathetic patients presented a significant improvement in tapping test scores of 16% for the apathetic and 6% for the non-apathetic patients, respectively ( $P < 0.01$ ). Only the apathetic patients experienced a beneficial effect on asthenia and affective subscores of the VAS (Table 5).

### PET data

Before MP, the region of interest analysis showed the mean ( $\pm$ SD) [ $^{11}$ C]-raclopride BP values of 2.2 (0.5) and 2 (0.8) in the caudate nucleus and 3.5 (1.1) and 3.1 (0.8) in the putamen of apathetic and non-apathetic patients, respectively. After MP the reduction of BP was greater for non-apathetic patients in the same regions with a percentage of decrease of 3% ( $P = 0.4$ ) in apathetic patients versus 8.8% ( $P < 0.05$ ) in non-apathetic patients for both the caudate nucleus and putamen.

Using SPM, at baseline (i.e. without MP intake), differences of [ $^{11}$ C]-raclopride BP values were noted when both groups of patients were compared. The [ $^{11}$ C]-raclopride BP values were greater in apathetic patients bilaterally in the orbitofrontal cortex (OFC) [Brodmann area (BA) 10/11/47], posterior cingulate cortex (PCC) (BA 31) and temporal cortex (BA 36/20) and the left dorsolateral prefrontal cortex (DLPFC) (BA 9/46), dorsal and ventral striatum bilaterally, the left thalamus and the right amygdala. These results are presented in Fig. 3 and in Table 6.

After MP intake, variations of [ $^{11}$ C]-raclopride BP values before and after MP (i.e. the increase of synaptic dopamine release) were greater in the non-apathetic group of patients. This was observed bilaterally in the OFC (BA/11/47/10), DLPFC (BA 9/46) and anterior cingulate cortex (ACC) (BA 24/32), in the left PCC (BA 31), left thalamus, left internal globus pallidus and in the right temporal cortex (BA 20/36/35/7). These results are presented in Table 7 and Fig. 4. Finally we did not observe any significant covariations between the Starkstein apathy score and the tracer uptake.



**Table 5** Characteristics of the patients enrolled in the PET study

|                                     | Non-apathetic (n = 13)                                |                           | Apathetic (n = 12)                                                                  |                           |
|-------------------------------------|-------------------------------------------------------|---------------------------|-------------------------------------------------------------------------------------|---------------------------|
| Sex                                 | 3 F, 10 M                                             |                           | 6 F, 6 M                                                                            |                           |
| Age (years)                         | 58.0 ± 4.8                                            |                           | 55.8 ± 4.9 <sup>NS</sup>                                                            |                           |
| Disease duration (years)            | 10.5 ± 3.0                                            |                           | 10.3 ± 2.2 <sup>NS</sup>                                                            |                           |
| <b>Baseline</b>                     |                                                       |                           |                                                                                     |                           |
| Antiparkinsonian treatment (mg/day) | L-dopa: 1226.9 ± 707.9<br>Dopamine agonist: 32.2 ± 18 |                           | L-dopa: 1352.8 ± 969.7 <sup>NS</sup><br>Dopamine agonist: 25.7 ± 10.5 <sup>NS</sup> |                           |
| Mattis dementia score               | 138.2 ± 3.9                                           |                           | 139.8 ± 3.4 <sup>NS</sup>                                                           |                           |
| UPDRS III                           | OFF L-dopa                                            | ON L-dopa                 | OFF L-dopa                                                                          | ON L-dopa                 |
| Starkstein apathy score (SAS)       | 38.6 ± 11.8                                           | 11.2 ± 8.4*               | 36.0 ± 16.3 <sup>NS</sup>                                                           | 12.2 ± 8.0*               |
| Beck depression inventory (BDI)     | 8.7 ± 5.0                                             | 6.8 ± 4.0*                | 11.3 ± 7.9 <sup>NS</sup>                                                            | 9.0 ± 10.5*               |
| Beck anxiety inventory (BAI)        | 8.8 ± 5.7                                             | 7.3 ± 6.2*                | 17.9 ± 10.2 <sup>NS</sup>                                                           | 10.3 ± 6.2*               |
| Norris VAS asthenia subscore        | 11.5 ± 4.4                                            | 6.5 ± 6.9*                | 19.6 ± 14.0 <sup>NS</sup>                                                           | 11.3 ± 11.1*              |
|                                     | 37.6 ± 13.5                                           | 15.8 ± 11.3*              | 42.8 ± 15.2 <sup>NS</sup>                                                           | 18.5 ± 13.0*              |
| <b>At the time of the PET</b>       |                                                       |                           |                                                                                     |                           |
| Antiparkinsonian treatment (mg/day) | L-dopa: 142.3 ± 152.6                                 |                           | L-dopa: 139.6 ± 159.4 <sup>NS</sup>                                                 |                           |
| Stimulation parameters              | 3.03 ± 0.5 V/ 62.3 ± 8.2 µs/<br>134.2 ± 11.3 Hz       |                           | 2.9 ± 0.5 V/66.5 ± 12.8 µs/<br>137.9 ± 14.4 Hz                                      |                           |
| UPDRS III                           | ON L-dopa                                             |                           | ON L-dopa                                                                           |                           |
| SAS                                 | 10.3 ± 5.9                                            |                           | 14.5 ± 9.9                                                                          |                           |
| BDI                                 | 6.1 ± 4.1                                             |                           | 22.4 ± 6.8 <sup>§</sup>                                                             |                           |
| BAI                                 | 3.3 ± 2.6                                             |                           | 13.3 ± 3.2 <sup>§</sup>                                                             |                           |
|                                     | 0 ± 0                                                 |                           | 12.9 ± 10.5 <sup>§</sup>                                                            |                           |
| Norris VAS asthenia subscore        | MP–                                                   | MP+                       | MP–                                                                                 | MP+                       |
| Tapping test (number/2 min)         | 19.0 ± 12.8                                           | 17.5 ± 10.9               | 37.0 ± 17.8                                                                         | 26.8 ± 16.4 <sup>Δ</sup>  |
|                                     | 250.4 ± 14.5                                          | 266.5 ± 15.3 <sup>Δ</sup> | 242.1 ± 13.2                                                                        | 281.0 ± 16.9 <sup>Δ</sup> |

At baseline: in the OFF L-DOPA condition no statistically significant difference (NS) was observed whatever the variables between group (Mann and Whitney). After acute L-DOPA challenge, statistically significant changes of the UPDRS part III, SAS, BDI, BAI and VAS asthenia and affect scores were noted in both groups. Higher SAS, VAS, BDI, BAI scores indicate higher feelings of apathy, asthenia, sadness, anxiety. Average values are indicated as mean ± SD.

At the time of PET-scanning: treatment did not differ between groups (NS). SAS, BDI and BAI scores significantly differ between both groups (<sup>§</sup> $P < 0.0001$ ). After methylphenidate, only apathetic patients presented a statistically significant improvement of the VAS asthenia and affect scores (<sup>Δ</sup> $P < 0.05$ ).

Average values are indicated as mean ± SD.

MP– = before methylphenidate; MP+ = after methylphenidate.

\* $P < 0.05$ .

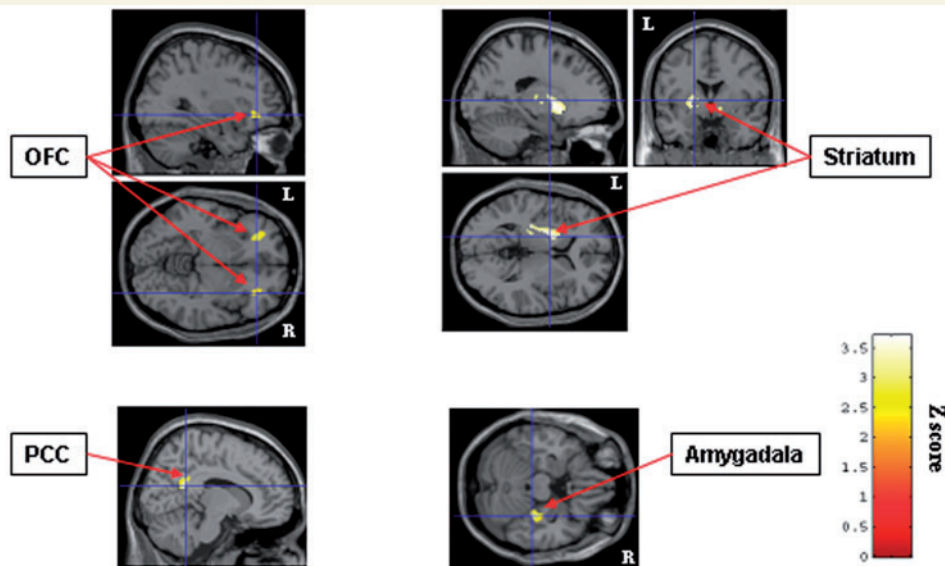

**Figure 3** Areas of increased [<sup>11</sup>C]-raclopride binding potential values in Apathetic versus Non-apathetic patients with Parkinson's disease (i.e. reduction of endogenous dopamine). The [<sup>11</sup>C]-raclopride binding potential values were greater in apathetic patients bilaterally in the OFC (BA 10, 11, 47), PCC (BA 31) and temporal (BA 36, 20) cortices, the left DLPFC (BA 9, 46), the dorsal and ventral striatum bilaterally, the left thalamus and the right amygdala. The figure shows the OFC bilaterally, the PCC, the left striatum and the right amygdala. These regions are superimposed on a single subject brain MRI from SPM2.



**Table 6** [<sup>11</sup>C]-Raclopride binding in apathetic and non-apathetic Parkinson's disease patients at baseline (before MP)

| Areas                                                          | Left/right | Stereotactic coordinates (regional maxima) |     |     | Z-score | P uncorr voxel | Cluster size |
|----------------------------------------------------------------|------------|--------------------------------------------|-----|-----|---------|----------------|--------------|
|                                                                |            | x                                          | y   | z   |         |                |              |
| Increase of binding in Apathetic versus Non-apathetic patients |            |                                            |     |     |         |                |              |
| OFC (BA 11, 47, 10)                                            | L          | –28                                        | 38  | –10 | 3.78    | 0.0001         | 245          |
|                                                                | R          | 32                                         | 36  | –6  | 3.24    | 0.001          | 24           |
| DLPFC (BA 9, 46)                                               | L          | –32                                        | 30  | 12  | 3.28    | 0.001          | 245          |
| PCC (BA 31)                                                    | R          | 12                                         | –50 | 20  | 4.53    | 0.0001         | 113          |
|                                                                | L          | –8                                         | –50 | 40  | 3.11    | 0.001          | 67           |
| Temporal cortex (BA 36, 20)                                    | L          | –32                                        | –6  | –36 | 3.78    | 0.0001         | 108          |
|                                                                | R          | 34                                         | –32 | 22  | 4.01    | 0.0001         | 167          |
| Amygdala                                                       | R          | 34                                         | 2   | –24 | 3.22    | 0.001          | 77           |
| Striatum (dorsal and ventral)                                  | L          | –16                                        | 6   | –2  | 3.10    | 0.001          | 441          |
|                                                                | L          | –18                                        | 0   | 4   | 3.10    | 0.001          |              |
| Thalamus                                                       | L          | –22                                        | –22 | 6   | 3.05    | 0.001          | 28           |
| Increase of binding in Non-apathetic versus Apathetic patients |            |                                            |     |     |         |                |              |
|                                                                |            | None                                       |     |     |         |                |              |

**Table 7** Differences of variations of [<sup>11</sup>C]-raclopride binding after MP

| Areas                                                                     | Left/right | Stereotactic coordinates (regional maxima) |     |     | Z-score | P uncorr voxel | Cluster size |
|---------------------------------------------------------------------------|------------|--------------------------------------------|-----|-----|---------|----------------|--------------|
|                                                                           |            | x                                          | y   | z   |         |                |              |
| Increase of binding variations in Non-apathetic versus Apathetic patients |            |                                            |     |     |         |                |              |
| OFC (BA 11, 47, 10)                                                       | L          | –42                                        | 56  | 12  | 4.31    | 0.0001         | 167          |
|                                                                           |            | –2                                         | 62  | 10  | 3.51    | 0.0001         | 37           |
|                                                                           |            | –40                                        | 58  | 2   | 3.43    | 0.0001         | 71           |
|                                                                           | R          | 30                                         | 26  | –2  | 3.55    | 0.0001         | 77           |
|                                                                           |            | 2                                          | 60  | 12  | 3.67    | 0.0001         | 57           |
|                                                                           |            | 54                                         | 0   | 26  | 4.17    | 0.0001         | 519          |
| DLPFC (BA 9, 46)                                                          | R          | 8                                          | 46  | 32  | 3.25    | 0.001          | 35           |
|                                                                           |            | –42                                        | 56  | 12  | 4.31    | 0.0001         | 167          |
|                                                                           |            | –48                                        | –2  | 26  | 3.17    | 0.001          | 14           |
| ACC (BA 24, 32)                                                           | L          | –2                                         | –20 | 42  | 3.43    | 0.0001         | 65           |
|                                                                           |            | –2                                         | 58  | 2   | 3.38    | 0.0001         | 15           |
|                                                                           | R          | 2                                          | 54  | 2   | 3.45    | 0.0001         | 17           |
|                                                                           |            | 2                                          | –22 | 42  | 3.43    | 0.0001         | 65           |
| PCC (BA 31)                                                               | L          | –6                                         | –50 | 40  | 3.29    | 0.0001         | 36           |
| Temporal cortex (BA 20, 35, 36, 7)                                        | R          | 32                                         | –32 | –22 | 4.08    | 0.0001         | 277          |
| Internal globus pallidus                                                  | L          | –12                                        | 2   | 2   | 3.10    | 0.001          | 17           |
| Thalamus                                                                  | L          | –4                                         | –6  | 14  | 3.19    | 0.001          | 246          |
| Increase of binding variations in Apathetic versus Non-apathetic patients |            |                                            |     |     |         |                |              |
|                                                                           |            | None                                       |     |     |         |                |              |

## Discussion

In a prospective study with monthly follow-up over a 12-month period, more than half of the patients with Parkinson's disease, surgically implanted for chronic STN DBS with an 82% decrease in dopaminergic medication within 2 weeks after surgery, developed

apathy in an average 6-month time period. Approximately half of the patients with postoperative apathy also developed depression. Depression was always reversible and apathy had disappeared in half of the patients at the 12-month follow-up. Pathological hyperdopaminergic behaviours were present in one-third of the patients at baseline and disappeared in all patients during follow-up. Non-motor fluctuations in daily life emerged as the

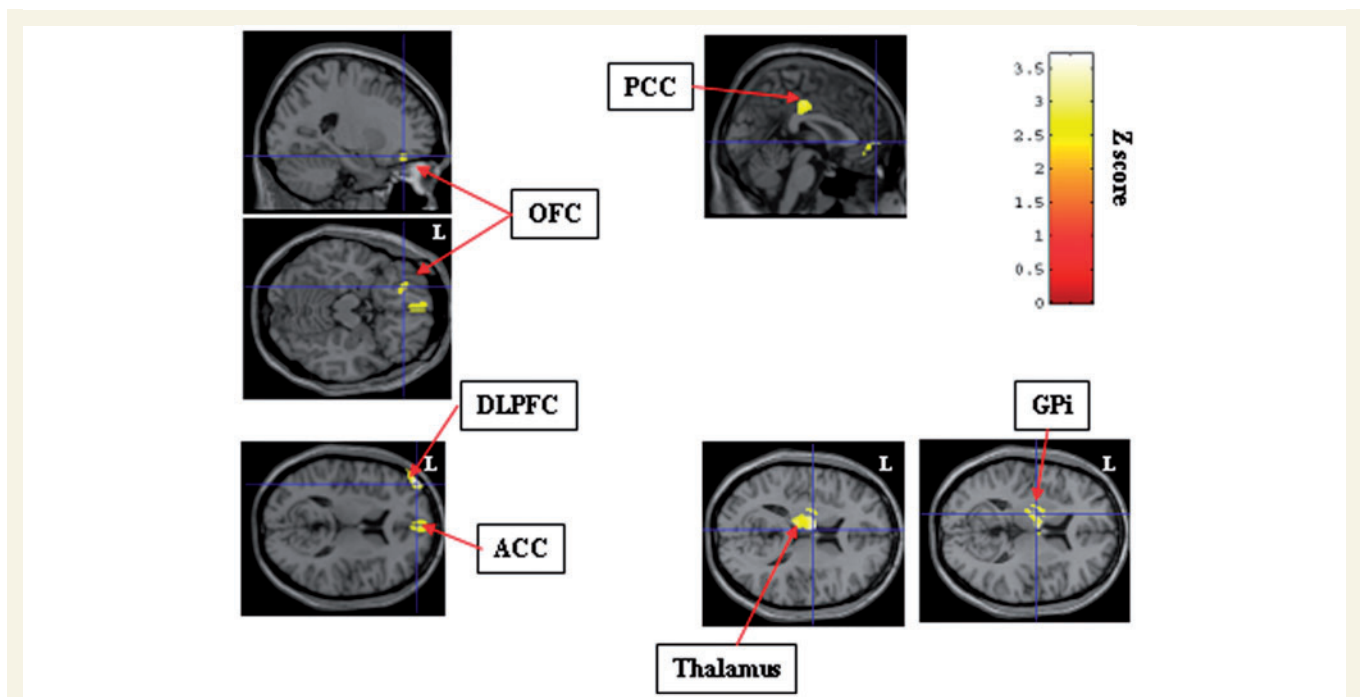

**Figure 4** Areas of greater changes of [ $^{11}\text{C}$ ]-raclopride-binding potential values induced by MP intake in non-apathetic versus apathetic patients with Parkinson's disease (i.e. greater methylphenidate-induced release of dopamine). After MP intake, the variations of [ $^{11}\text{C}$ ]-raclopride-binding potential values before and after methylphenidate (i.e. the increase of synaptic dopamine release) were greater in the non-apathetic group of patients. This was observed bilaterally in the OFC (BA 11, 47, 10), DLPFC (BA 9, 46) and ACC (BA 24, 32) cortices, in the left PCC (BA 31), left thalamus, left internal globus pallidus (GPi) and in the right temporal cortex (BA 20, 36, 35, 7). Some of these regions are presented, superimposed on a single subject brain MRI from SPM2.

main predictors of postoperative apathy. Baseline motor fluctuations reflecting nigrostriatal dopaminergic lesions, baseline cognitive function, total dopaminergic treatment at baseline and postoperative reduction in dopaminergic treatment did not predict the occurrence of apathy. The PET study demonstrates that patients with Parkinson's disease, who develop postoperative apathy, anxiety and depression, have a greater mesocorticolimbic dopaminergic denervation than patients who do not. This preferential dopaminergic degeneration affects notably the projections to the OFC, DLPFC and cingulate cortices, the left ventral striatum and the right amygdala.

## Mechanisms of apathy

Although apathy is a known complication of STN DBS in Parkinson's disease (Krack *et al.*, 2003; Drapier *et al.*, 2006), its mechanisms are not well understood. While depression and anxiety in the premotor phase of Parkinson's disease have been related to lesions of the mesolimbic dopaminergic system, the locus coeruleus and the raphe nuclei, the neuropathological substrate of apathy in the premotor phase is unknown (Tolosa *et al.*, 2009). Severe loss of nigrostriatal dopaminergic fibres is the most consistent and specific lesion in Parkinson's disease. The other 'long length dopamine system', the ventral tegmental area, which projects to the ventral striatum (nucleus accumbens), the limbic cortex (medial prefrontal, cingulate and entorhinal areas) and other limbic structures (septum, olfactory tubercle,

amygdala and pyriform cortex), is less severely damaged (Lees, 2009). Two major hypotheses have been proposed to explain the occurrence of apathy after STN DBS. First, postoperative apathy has been considered as a dopamine withdrawal syndrome because it responds to dopamine agonist treatment (Czernecki *et al.*, 2008). Second, it has been postulated that postoperative apathy corresponds to a specific side effect of stimulation of the limbic part of the STN (Drapier *et al.*, 2006; Le Jeune *et al.*, 2008; Temel *et al.*, 2009). The main argument for this last assumption is the absence of correlation between postoperative apathy and the reduction in dopaminergic treatment. However, as acute STN DBS has psychostimulant effects (Funkiewiez *et al.*, 2003) similar to those of L-dopa (Maricle *et al.*, 1995; Funkiewiez *et al.*, 2003), this last assumption seems unlikely. An alternative explanation, which would explain why some but not all of the patients develop postoperative apathy, would be individual variations in the neurodegenerative process. In the present study, baseline non-motor fluctuations emerged as a major risk factor for the development of postoperative apathy. In some studies apathy was associated with more severe motor symptoms (Pedersen *et al.*, 2009, 2010), suggesting that apathy and more severe parkinsonism may be caused by a common underlying mechanism. Our clinical and imaging findings are very much in favour of a mesolimbic rather than a nigrostriatal lesion at the origin of parkinsonian apathy. This is also in agreement with the important role of the ventral tegmental area in motivated behaviour (Javoy Agid and Agid, 1980; Rodriguez-Oroz *et al.*, 2009; Voon *et al.*, 2009). Decreased

novelty seeking and reward processing, which contribute to parkinsonian apathy and are present in *de novo* Parkinson's disease, respond to dopaminergic treatment and have been related to mesolimbic dopaminergic lesions (Menza *et al.*, 1993; Bodi *et al.*, 2009; Rodriguez-Oroz *et al.*, 2009). The present study gives strong arguments in favour of the dopaminergic hypothesis. Indeed, motor outcome does not differ between patients that become apathetic and those who do not, which indicates that electrode placement is in the dorsolateral sensorimotor rather than the more anteromedial limbic part of the STN in both groups. In our study, medication withdrawal took place immediately after surgery and stimulation parameters were increased almost exclusively during the first 2 weeks. The monthly evaluations showed that apathy occurred very progressively and not in response to changes in stimulation, which is compatible with a delayed dopamine withdrawal syndrome or with a process of desensitization rather than with an effect directly related to stimulation of the non-motor territories of the STN. Finally, the present PET study clearly shows a mesolimbic denervation as a substrate of postoperative dopamine withdrawal syndrome and strongly suggests that individual differences in denervation explain the occurrence of apathy, anxiety and depression. Our findings suggest that, in selected patients with Parkinson's disease displaying no cognitive deterioration, postoperative apathy can be seen as a model of a pure mesolimbic hypodopaminergic syndrome, which is unmasked by postoperative drug withdrawal.

Interestingly, although dopaminergic treatment was reduced immediately after surgery, the mean delay in the appearance of apathy was approximately 6 months. The long-term effects of L-DOPA on the motor signs have been neglected in the past (Fahn *et al.*, 2004). The reduction in dopamine replacement therapy and the replacement of a pulsatile pharmacological treatment by a non-pulsatile, electrical one seems to contribute to progressive desensitization and disappearance not only of L-dopa -induced dyskinesias (Krack *et al.*, 1999; Bejjani *et al.*, 2000; Moro *et al.*, 2002) but also of ON-period related euphoria and hyperdopaminergic behaviour (Witjas *et al.*, 2005; Ardouin *et al.*, 2006) unmasking the hypodopaminergic face of the disease.

## Depression and anxiety

Approximately half of the patients who developed apathy also suffered from depression. In a few patients this depression was reactive to major life events, but in the vast majority it occurred simultaneously with apathy or shortly after the occurrence of isolated apathy. Depression was always reversible—mainly in response to the re-introduction of dopaminergic treatment (data not shown). Therefore, although apathy is considered as a distinct syndrome, different from depression (Starkstein *et al.*, 1992; Levy *et al.*, 1998), there is a high comorbidity of both entities (Starkstein *et al.*, 2009) and our data are in favour of a continuum between isolated parkinsonian apathy and parkinsonian depression with an important apathetic component, both being part of a hypodopaminergic syndrome. Depression was diagnosed using the BDI. We applied a cut-off score of 20 that was originally suggested by Beck and colleagues to diagnose severe depression in non-Parkinson's disease populations. We chose this high score

in order to avoid too much overlap with apathy. We could not use Diagnostic and Statistical Manual of Mental Disorders-IV criteria for the systematic monthly follow-up in such a large cohort to diagnose depression and this is a limitation of our study. The mechanisms of postoperative suicide as a delayed complication of chronic STN DBS for Parkinson's disease are multifactorial (Voon *et al.*, 2008), but our data are in favour of a major contribution of dopamine withdrawal in depressive mood. Our data also corroborate the hypothesis of an important role of mesolimbic dopaminergic dysfunction in depression (Nestler and Carlezon, 2006).

In the multivariate analysis, preoperative anxiety emerged as the most important predictor of apathy next to non-motor fluctuations (which include symptoms of apathy, depression and anxiety). The study primarily intended to study the frequency and mechanisms of apathy. Depression was monitored because of the risk of suicide attempts (Voon *et al.*, 2008). While in the literature there is ample discussion of the relationship and differences between depression and apathy (Starkstein *et al.*, 1992; Levy *et al.*, 1998), very little is known about the potential relationship between apathy and anxiety. In early untreated Parkinson's disease, depression, apathy and anxiety are the most common psychiatric symptoms indicating that anxiety is also part of a hypodopaminergic syndrome in the same way as apathy and depression (Shiba *et al.*, 2000; Aarsland *et al.*, 2009). A limitation of our study is the absence of monthly evaluations of anxiety; but anxiety was increased in the apathetic patients with Parkinson's disease participating in the PET study. Baseline OFF-period anxiety scores were higher in the Apathy Group and baseline anxiety fluctuations were a main predictor of postoperative apathy. Therefore, anxiety also seems to be part of the hypodopaminergic syndrome (Ardouin *et al.*, 2009a).

## Non-motor fluctuations

The concept of non-motor fluctuations is nebulous, referring to a conglomerate of fluctuations in neuropsychiatric, dysautonomic and sensory symptoms that are difficult to disentangle. Non-motor fluctuations are not only clinically relevant, frequent and disabling but they are also a key determinant of the quality of life. As these symptoms fluctuate in parallel with motor symptoms, a dopaminergic pathophysiology has been discussed (Witjas *et al.*, 2002; Stacy *et al.*, 2005, 2010; Rahman *et al.*, 2008; Barone *et al.*, 2009; Chaudhuri and Schapira, 2009). While specific validated tools have been developed to assess the full spectrum of non-motor symptoms (Chaudhuri *et al.*, 2006; Goetz *et al.*, 2008; Chaudhuri and Schapira, 2009), fluctuations of these symptoms have only rarely been assessed (Witjas *et al.*, 2002; Stacy *et al.*, 2005). In the present paper we referred to non-motor fluctuations in a more restricted neuropsychiatric sense and we took into account not only OFF-period dysphoria but also ON-period euphoria. We found non-motor fluctuations in everyday life (Ardouin *et al.*, 2009a) to be a main predictor of postoperative apathy. The presence of non-motor fluctuations at baseline corresponds to a 2.5-fold increase in the risk of developing apathy. Such neuropsychological/behavioural fluctuations are difficult to evaluate and the lack of validated instruments is a limitation of this study. Assessment of acute psychotropic effects of L-dopa

during a L-dopa challenge contributed to a better characterization of the non-motor fluctuations in everyday life, showing that they consist of a variety of symptoms including aspects of motivation, mood and anxiety. Assessment of fluctuations in apathy (SAS), depression (BDI) and anxiety (BAI) during the acute L-dopa challenge using scales designed to evaluate a chronic state rather than an acute evaluation also proved to be useful in predicting the occurrence of apathy. These scales (which are not validated for this particular use) were used in parallel to a VAS that, although designed to assess acute effects of drugs, is less specific in regard to apathy, anxiety or depression. As an example, the hazard ratio of 1.1 for delta apathy scores indicates that an increase of one point on the Starkstein apathy score at baseline OFF-drug compared to the baseline ON-drug condition corresponds to a 10% increase in the risk of developing postoperative apathy. A baseline fluctuation of 5 points on the apathy score will lead to a 1.6-fold increase and a fluctuation of 10 points to a 2.5-fold increase in postoperative apathy. Evaluation of the psychotropic effects of L-dopa appears to be of paramount importance in the management of Parkinson's disease and such tools need to be further developed and validated. Moreover, the non-motor fluctuations—when assessed using the described methodology—are likely to reflect mesolimbic dopaminergic denervation as evidenced by neuroimaging.

## Implications for the management of Parkinson's disease

The relatively high frequency of apathy observed in the present study cannot only be explained by the monthly screening using a specific apathy scale, it is also likely to be related to a more drastic reduction in dopaminergic treatment (–82% at 1 month, 73% at 1 year) compared to the 50–60% reduction in most other studies (Kleiner-Fisman *et al.*, 2006). More importantly, dopamine agonist drugs were stopped in all the patients, a strategy that has not been tested so far. In the present study dopamine agonists were systematically stopped (i) because of the high frequency of pathological hyperdopaminergic behaviours in patients on therapeutic doses of dopamine agonists (Bostwick *et al.*, 2009), (ii) because of the high risk of postoperative decompensation or of a new incidence of pathological behaviours when subthalamic stimulation is added to medical treatment (Houeto *et al.*, 2002; Smeding *et al.*, 2007; Lim *et al.*, 2009) and (iii) in the light of recent experience showing that postoperative reduction in dopaminergic treatment leads to the improvement of impulse control disorders existing before surgery (Witjas *et al.*, 2005; Ardouin *et al.*, 2006). A further reason for discontinuing dopamine agonists was specifically to investigate the role of dopamine agonists on parkinsonian apathy (Ardouin *et al.*, 2009b, in press). With this approach, we observed a higher than usual incidence of postoperative apathy but we did not observe a single case of new onset impulse control disorder. One year after surgery, dopamine dysregulation syndrome and behavioural addictions had disappeared in all patients. These results differ markedly from those of another study, which reports a high rate of impulse control disorders in selected patients who displayed preoperative hyperdopaminergic

behaviours and remained on high doses of dopaminergic treatment (Lim *et al.*, 2009). Thus, differences in medical management might largely explain the variations in reported hyperdopaminergic behavioural complications (Houeto *et al.*, 2002; Witjas *et al.*, 2005; Ardouin *et al.*, 2006; Smeding *et al.*, 2007; Lim *et al.*, 2009). Differences in both the extent of mesolimbic denervation and in postoperative patient management can also resolve the seemingly paradoxical postoperative occurrence of either impulse control disorders on the one hand, or apathy, anxiety and depression on the other (Houeto *et al.*, 2002; Krack *et al.*, 2003; Drapier *et al.*, 2006; Smeding *et al.*, 2006; Voon *et al.*, 2008; Lim *et al.*, 2009).

It is important to note the much-delayed appearance of apathy and depression in our cohort, despite the immediate postoperative withdrawal of dopamine agonists and the reduction of L-dopa. The monthly evaluations allowed early detection of apathy and depression. While treatment for apathy with a dopamine agonist could be delayed by 3 months if patients participated in the ongoing double blind pharmacological study testing the impact of prirbedil versus placebo on parkinsonian apathy, the presence of a depression score >20 was an exclusion criterion and depressed patients had early treatment intervention, consisting mainly of the re-introduction of a dopamine agonist drug. With this approach, depression was always reversible and apathy had disappeared in half of the patients by the 12-month follow-up. Depression was present almost exclusively in the Apathy group, indicating that baseline non-motor fluctuations should also be considered as a risk factor for the delayed appearance of depression and suicide risk. In a previous study postoperative depression, being single, being younger, having earlier disease onset, previous suicide attempts or a previous history of impulse control disorders or compulsive medication use were all identified as risk factors for postoperative suicide risk (Voon *et al.*, 2008). Our data underline the importance of long-term neuropsychological follow-up of patients with Parkinson's disease treated with STN DBS, especially in patients at risk. Postoperative apathy is frequently associated with anxiety or depression and seems to be the tip of the iceberg of a larger spectrum of hypodopaminergic symptoms. After surgery apathy should be detected and treated early on with dopaminergic drugs in order to prevent postoperative depression with suicidal risk.

## General interpretation of the PET results

Apathy being associated with depression and anxiety, our PET findings should be interpreted in light of the three components of this hypodopaminergic syndrome. At baseline, apathetic patients have greater [<sup>11</sup>C]-raclopride binding mainly in limbic circuits, which may be interpreted either as an increase of the density of dopaminergic D2/D3 receptors or as a reduction of endogenous synaptic dopamine levels (Gjedde *et al.*, 2005). After MP, which blocks the presynaptic dopamine transporters with a higher affinity to the mesolimbic compared to the nigrostriatal projections (Di Chiara and Imperato, 1988) and induces an increase of dopamine release (Schwery *et al.*, 1985), the changes of [<sup>11</sup>C]-raclopride binding were greater in Non-athetic patients with Parkinson's disease, which suggests a greater capacity to release



dopamine. Therefore, the occurrence of apathy, anxiety and depression could be explained by a lower density of presynaptic dopaminergic terminals, especially in the mesocorticolimbic system. This could explain the unmasking of hypodopaminergic symptoms if dopaminergic treatment is decreased, as is the case after surgery. The absence of correlation between the severity of apathy and the importance of the dopaminergic degeneration may be related to the fact that apathy was not isolated, but part of a larger hypodopaminergic syndrome including apathy, anxiety and depression.

## Implication of the prefrontal cortex

The present study suggests that dopaminergic denervation of the OFC, which has a role in 'drive', reward and compulsive behaviours (Volkow *et al.*, 2009), is involved in the physiopathology of apathy, anxiety and depression. In drug-addicts, hypometabolism in the OFC is responsible for apathy during periods of abstinence (Volkow *et al.*, 2009). Apathy has also been related to left OFC hypometabolism in Alzheimer's disease and frontotemporal dementia (Migneco *et al.*, 2001; Benoit *et al.*, 2002; Holthoff *et al.*, 2005; Peters *et al.*, 2006). Conversely, patients with Parkinson's disease and pathological gambling have an increased perfusion of the right OFC (Cilia *et al.*, 2008). In addition, we also found greater dopaminergic denervation of the DLPFC in apathetic patients with Parkinson's disease, in keeping with findings of hypometabolism in drug-addicts during abstinence periods and in Alzheimer's disease (Migneco *et al.*, 2001; Benoit *et al.*, 2002; Volkow *et al.*, 2009). In the same vein, a recent PET fluorodesoxyglucose study revealed that (mild) apathy after STN surgery was associated with a reduction of DLPFC metabolism (Le Jeune *et al.*, 2009). Taken together, the dysfunction of these two prefrontal regions could explain, on the one hand, the emotional component of apathy (mediated by the OFC) and, on the other hand, the cognitive component of apathy (mediated by the DLPFC) (Levy and Dubois, 2006).

## Involvement of the basal ganglia and of the thalamus

The present work underlines the crucial role of the left striatum, in particular its ventral part (including the accumbens nucleus), thalamus and internal globus pallidus (especially its ventral/limbic part) in the physiopathology of hypodopaminergic symptoms in Parkinson's disease, and it suggests a lateralization effect. A previous imaging study using a marker of both dopamine and noradrenaline transporter binding has shown that parkinsonian apathy and depression correlated with ventral striatal and thalamic dopaminergic and/or noradrenergic denervation (Remy *et al.*, 2005). Conversely, in drug addiction, euphoria induced by drug intake is associated with dopamine release in the ventral striatum and is proportional to the amount of dopamine release (Drevets *et al.*, 2001; Leyton *et al.*, 2002; Volkow *et al.*, 2009). Furthermore, during abstinence periods, drug-addicts become apathetic and have reduced dopaminergic cell activity (Wu *et al.*, 1997; Volkow *et al.*, 2009). Patients with Parkinson's disease and hyperdopaminergic behaviours exhibit increased ventral striatal

dopamine release after L-dopa intake (Evans *et al.*, 2006) or when involved in compulsive behaviour (Steeves *et al.*, 2009). These findings fit well with the motivational role of ventral tegmental dopaminergic neurons and their mesocorticolimbic projections (Schultz, 1998; Wise, 2009).

The present study suggests a specific role of a left-sided basal ganglia dopaminergic denervation in the occurrence of apathy in Parkinson's disease. This is in line with functional MRI studies showing that negative manifestations in schizophrenia are linked to left striatal hypometabolism (Schlagenhauf *et al.*, 2008). Inversely, in healthy subjects, the increase of incentive motivation is related to an increased density of dopamine D2 receptors in the left versus right striatum (Tomer and Aharon-Peretz, 2004). Furthermore, the less important the dopaminergic innervation in the left caudate nucleus, the less important the novelty seeking personality (Menza *et al.*, 1995). All these data support a specific role of the left-sided striatum not only in motivational aspects of the personality of normal subjects but also in the occurrence of apathy, anxiety and depression in Parkinson's disease. On the other hand, dysfunction of the right-sided basal ganglia, notably the ventral pallidum, could lead to pathological gambling in Parkinson's disease (Cilia *et al.*, 2008).

## Implication of the temporal cortex and amygdala

The present study also points to a role of dopaminergic denervation of the limbic part of the temporal cortex and of the right amygdala in the physiopathology of apathy, anxiety and depression in Parkinson's disease. The dopaminergic innervation of the amygdala plays an important role in the processing of salient aversive stimuli in conjunction with the ACC (LeDoux, 2003; Kienast *et al.*, 2008). Interestingly, basolateral amygdala neurons send excitatory projections to the nucleus accumbens (Brog *et al.*, 1993) and a recent study has demonstrated that reward-seeking behaviour, which is driven by the nucleus accumbens, is under the control of both the amygdala and dopaminergic projections from the ventral tegmental area (Ambroggi *et al.*, 2008). Thus, our findings could well explain the loss of the reward-seeking behaviour seen in apathy. In addition, other authors have shown a relationship between the importance of the dopaminergic and noradrenergic degeneration in the right amygdala and the occurrence of depression and anxiety in Parkinson's disease (Remy *et al.*, 2005). Our results extend these findings suggesting that dysfunction of the amygdala may also be implicated in apathy.

## Implication of ACC and PCC

This study highlights the role of anterior and posterior cingulate dysfunction in the pathogenesis of apathy, anxiety and depression in Parkinson's disease. Convergent arguments have shown that the PCC plays a critical role in the regulation of negative emotions by encoding the emotional significance of stimuli (Liotti *et al.*, 2000; Maddock *et al.*, 2003). Perfusion of the PCC is diminished in depression and anxiety (Mayberg *et al.*, 2000; Simpson *et al.*, 2001). Both ACC and PCC metabolism is also reduced in apathetic patients with Parkinson's disease after STN stimulation (Le Jeune

*et al.*, 2009). In the same vein, in Alzheimer's disease, apathy is associated with reduced perfusion of the right ACC (Migneco *et al.*, 2001; Benoit *et al.*, 2002). Finally it has been shown that patients with Parkinson's disease with L-dopa-induced mood fluctuations, in comparison to Parkinson's disease patients without, present an increased perfusion of the PCC and medial frontal gyrus in response to L-dopa (Black *et al.*, 2005). The present study demonstrates that the PCC is involved in the physiopathology of apathy as well as the ACC, OFC and DLPFC, all regions from which the PCC receives projections (Vogt *et al.*, 2003).

## Behavioural desensitization

Despite reduced dopamine release after an oral dose of MP, the reinforcing psychotropic effect of this drug, with improvement in subjective feelings of fatigue and unhappiness, was only significant in apathetic patients, which may, at first glance, appear as paradoxical. We cannot exclude a 'floor effect' in non-aphathetic patients, but a greater postsynaptic dopaminergic sensitization in the apathetic patients with a larger presynaptic mesolimbic denervation seems more likely. Indeed, repeated and pulsatile administration of psychostimulant drugs—including dopaminergic medication—can induce prolonged sensitization of behavioural effects, which is processed by the dopaminergic mesolimbic system, especially the nucleus accumbens (Evans *et al.*, 2006; Vezina and Leyton, 2009). This is mediated by a selective increase of dopaminergic D3 receptor density in the nucleus accumbens (Guillin *et al.*, 2001). While the reduction of dopamine input to this receptor has been associated with depression or anhedonia in Parkinson's disease (Lemke *et al.*, 2005), excessive stimulation of these receptors may cause dopamine dysregulation syndrome (Dodd *et al.*, 2005). In the present study, apathetic patients have a superior density or a greater affinity of dopaminergic D2/D3 receptors, which is consistent with a sensitization phenomenon. Thus, we hypothesize that apathetic patients have a greater sensitization to dopaminergic treatment at baseline and a cross-sensitization to MP that has a preferential action on mesolimbic dopaminergic projections (Di Chiara and Imperato, 1988). This is consistent with the greater baseline non-motor fluctuations—a key feature of dopamine dysregulation syndrome (Lawrence *et al.*, 2003)—in our patients who have developed postoperative apathy. After postoperative decrease of dopaminergic treatment, the process of sensitization would tend to reverse as is the case for L-dopa-induced dyskinesias (Bejjani *et al.*, 2000), thus unmasking the apathy related to mesolimbic dopaminergic denervation. Obviously, at the time of PET evaluation, desensitization was not complete, and patients still display a greater behavioural response to MP, despite having greater ventral tegmental (mesolimbic) dopaminergic denervation.

## Conclusion

Patients with Parkinson's disease with non-motor fluctuations are at greater risk of developing postoperative apathy and depression as part of a delayed dopamine withdrawal syndrome. The present study provides a clear demonstration that this hypodopaminergic

syndrome is related to a predominant degeneration of dopaminergic mesocorticolimbic projections.

We could speculate that, because of a lower dopaminergic tone at baseline within these mesocorticolimbic pathways, these patients with Parkinson's disease tend to increase dopaminergic medication intake in order to get the 'drive' effect of their drug. This would enhance the sensitization of the mesolimbic dopaminergic system via an upregulation of the D3 receptors, contributing to greater non-motor fluctuations and an increased risk of developing a dopamine dysregulation syndrome (Lawrence *et al.*, 2003; Weintraub, 2008). Thus, we hypothesize that the same patients who are at risk of developing a dopamine dysregulation syndrome on dopaminergic treatment would run a greater risk of developing apathy or a broader hypodopaminergic syndrome after successful surgery allowing for marked reduction in dopaminergic medication. Monitoring of apathy and depression after surgery and their treatment with dopaminergic drugs are essential in order to prevent postoperative depression and suicide, the most important complication of STN DBS (Voon *et al.*, 2008).

## Acknowledgements

We thank Mrs P. Martin-Maillet and Mrs C. Dalmolin for English corrections and S. Carnicella for helpful discussion.

## Funding

Programme Hospitalier de Recherche Clinique Interrégional and Euthérapie Pharmaceutical Company; The study sponsors had no role in the study design, data collection, data analysis, data interpretation or writing of the report; Medtronic for research purpose in the field of deep brain stimulation (to A.L.B., S.C., P.P., P.K.); Several authors received reimbursement of travel costs to scientific meetings by Medtronic (to A.L.B., S.C., P.P., P.K., S.T., E.B.); Euthérapie (to P.P., P.K., S.T., E.B.).

## References

- Aarsland D, Bronnick K, Alves G, Tysnes OB, Pedersen KF, Ehrt U, *et al.* The spectrum of neuropsychiatric symptoms in patients with early untreated Parkinson's disease. *J Neurol Neurosurg Psychiatry* 2009; 80: 928–30.
- Aarsland D, Larsen JP, Lim NG, Janvin C, Karlsen K, Tandberg E, *et al.* Range of neuropsychiatric disturbances in patients with Parkinson's disease. *J Neurol Neurosurg Psychiatry* 1999; 67: 492–6.
- Ambroggi F, Ishikawa A, Fields HL, Nicola SM. Basolateral amygdala neurons facilitate reward-seeking behavior by exciting nucleus accumbens neurons. *Neuron* 2008; 59: 648–61.
- Ardouin C, Chéreau I, Llorca PM, Lhommée E, Durif F, Pollak P, *et al.* Assessment of hyper- and hypo-dopaminergic behaviours in Parkinson's disease. *Rev Neurol (Paris)* 2009a; 165: 845–56.
- Ardouin C, Lhommée E, Thobois S, Klinger H, Lagrange C, Fraix V, *et al.* Piribedil improves apathy, depression and anxiety in Parkinson's disease. *Mov Disord* 2009b; 24 (Suppl 1): S233.
- Ardouin C, Pillon B, Peiffer E, Bejjani P, Limousin P, Damier P, *et al.* Bilateral subthalamic or pallidal stimulation for Parkinson's disease affects neither memory nor executive functions: a consecutive series of 62 patients. *Ann Neurol* 1999; 46: 217–23.

- Ardouin C, Voon V, Worbe Y, Abouazar N, Czernecki V, Hosseini H, et al. Pathological gambling in Parkinson's disease improves on chronic subthalamic nucleus stimulation. *Mov Disord* 2006; 21: 1941–6.
- Barbeau A. L-Dopa therapy in Parkinson's disease: a critical review of nine years experience. *Can Med Assoc J* 1969; 101: 791–800.
- Barone P, Antonini A, Colosimo C, Marconi R, Morgante L, Avarello TP, et al. The PRIAMO study: a multicenter assessment of nonmotor symptoms and their impact on quality of life in Parkinson's disease. *Mov Disord* 2009; 24: 1641–9.
- Beck AT, Epstein N, Brown G, Steer RA. An inventory for measuring clinical anxiety: psychometric properties. *J Consult Clin Psychol* 1988; 56: 893–7.
- Beck AT, Steer RA, Brown GK. Comparison of Beck Depression Inventories -IA and -II in psychiatric outpatients. *J Pers Assess* 1996; 67: 588–97.
- Bejjani BP, Arnulf I, Demeret S, Damier P, Bonnet AM, Houeto JL, et al. Levodopa-induced dyskinesias in Parkinson's disease: is sensitization reversible? *Ann Neurol* 2000; 47: 655–8.
- Benoit M, Koulibaly PM, Migneco O, Darcourt J, Pringuey DJ, Robert PH. Brain perfusion in Alzheimer's disease with and without apathy: a SPECT study with statistical parametric mapping analysis. *Psychiatry Res* 2002; 114: 103–11.
- Bhatia KP, Marsden CD. The behavioural and motor consequences of focal lesions of the basal ganglia in man. *Brain* 1994; 117 (Pt 4): 859–76.
- Black KJ, Hershey T, Hartlein JM, Carl JL, Perlmutter JS. Levodopa challenge neuroimaging of levodopa-related mood fluctuations in Parkinson's disease. *Neuropsychopharmacology* 2005; 30: 590–601.
- Bodi N, Keri S, Nagy H, Moustafa A, Myers CE, Daw N, et al. Reward-learning and the novelty-seeking personality: a between- and within-subjects study of the effects of dopamine agonists on young Parkinson's patients. *Brain* 2009; 132: 2385–95.
- Bostwick JM, Hecksel KA, Stevens SR, Bower JH, Ahlskog JE. Frequency of new-onset pathologic compulsive gambling or hypersexuality after drug treatment of idiopathic Parkinson disease. *Mayo Clin Proc* 2009; 84: 310–6.
- Brog JS, Salyapongse A, Deutch AY, Zahm DS. The patterns of afferent innervation of the core and shell in the 'accumbens' part of the rat ventral striatum: immunohistochemical detection of retrogradely transported fluoro-gold. *J Comp Neurol* 1993; 338: 255–78.
- Brown RG, Pluck G. Negative symptoms: the 'pathology' of motivation and goal-directed behaviour. *Trends Neurosci* 2000; 23: 412–7.
- Castelli L, Lanotte M, Zibetti M, Caglio M, Rizzi L, Ducati A, et al. Apathy and verbal fluency in STN-stimulated PD patients. An observational follow-up study. *J Neurol* 2007; 254: 1238–43.
- Cavanna AE, Servo S, Monaco F, Robertson MM. The behavioral spectrum of Gilles de la Tourette syndrome. *J Neuropsychiatry Clin Neurosci* 2009; 21: 13–23.
- Chaudhuri KR, Martinez-Martin P, Schapira AH, Stocchi F, Sethi K, Odin P, et al. International multicenter pilot study of the first comprehensive self-completed nonmotor symptoms questionnaire for Parkinson's disease: the NMSQuest study. *Mov Disord* 2006; 21: 916–23.
- Chaudhuri KR, Schapira AH. Non-motor symptoms of Parkinson's disease: dopaminergic pathophysiology and treatment. *Lancet Neurol* 2009; 8: 464–74.
- Cilia R, Siri C, Marotta G, Isaias IU, De Gaspari D, Canesi M, et al. Functional abnormalities underlying pathological gambling in Parkinson disease. *Arch Neurol* 2008; 65: 1604–11.
- Cotzias GC, Papavasiliou PS, Gellene R. Modification of parkinsonism: chronic treatment with L-Dopa. *N Engl J Med* 1969; 280: 337–45.
- Czernecki V, Pillon B, Houeto JL, Pochon JB, Levy R, Dubois B. Motivation, reward, and Parkinson's disease: influence of dopatherapy. *Neuropsychologia* 2002; 40: 2257–67.
- Czernecki V, Pillon B, Houeto JL, Welter ML, Mesnage V, Agid Y, et al. Does bilateral stimulation of the subthalamic nucleus aggravate apathy in Parkinson's disease? *J Neurol Neurosurg Psychiatry* 2005; 76: 775–9.
- Czernecki V, Schupbach M, Yaici S, Levy R, Bardinet E, Yelnik J, et al. Apathy following subthalamic stimulation in Parkinson disease: a dopamine responsive symptom. *Mov Disord* 2008; 23: 964–9.
- Di Chiara G, Imperato A. Drugs abused by humans preferentially increase synaptic dopamine concentrations in the mesolimbic system of freely moving rats. *Proc Natl Acad Sci USA* 1988; 85: 5274–8.
- Dodd ML, Klos KJ, Bower J, Geda YE, Josephs KA, Ahlskog JE. Pathological gambling caused by drugs used to treat Parkinson disease. *Arch Neurol* 2005; 62: 1377–81.
- Drapier D, Drapier S, Sauleau P, Haegelen C, Raoul S, Biseul I, et al. Does subthalamic nucleus stimulation induce apathy in Parkinson's disease? *J Neurol* 2006; 253: 1083–91.
- Drevets WC, Gauthier C, Price JC, Kupfer DJ, Kinahan PE, Grace A, et al. Amphetamine-induced dopamine release in human ventral striatum correlates with euphoria. *Biol Psychiatry* 2001; 49: 81–96.
- Dujardin K, Sockeel P, Devos D, Dellioux M, Krystkowiak P, Destee A, et al. Characteristics of apathy in Parkinson's disease. *Mov Disord* 2007; 22: 778–84.
- Evans AH, Lees AJ. Dopamine dysregulation syndrome in Parkinson's disease. *Curr Opin Neurol* 2004; 17: 393–8.
- Evans AH, Pavese N, Lawrence AD, Tai YF, Appel S, Doder M, et al. Compulsive drug use linked to sensitized ventral striatal dopamine transmission. *Ann Neurol* 2006; 59: 852–8.
- Fahn S, Oakes D, Shoulson I, Kieburtz K, Rudolph A, Lang A, et al. Levodopa and the progression of Parkinson's disease. *N Engl J Med* 2004; 351: 2547–9.
- Fields JA, Troster AI. Cognitive outcomes after deep brain stimulation for Parkinson's disease: a review of initial studies and recommendations for future research. *Brain Cogn* 2000; 42: 268–93.
- Fox SH, Lang AE. Levodopa-related motor complications—phenomenology. *Mov Disord* 2008; 23 (Suppl 3): S509–14.
- Friston KJ, Holmes AP, Worsley KJ, Poline JB, Frith CD, Frackowiak RSJ. Statistical parametric maps in functional imaging: a general linear approach. *Hum Brain Mapp* 1995; 2: 189–210.
- Funkiewiez A, Ardouin C, Caputo E, Krack P, Fraix V, Klinger H, et al. Long-term effects of bilateral subthalamic nucleus stimulation on cognitive function, mood and behaviour in Parkinson's disease. *J Neurol Neurosurg Psychiatry* 2004; 75: 834–9.
- Funkiewiez A, Ardouin C, Krack P, Fraix V, VanBlercom N, Xie J, et al. Acute psychotropic effects of bilateral subthalamic nucleus stimulation and levodopa in Parkinson's disease. *Mov Disord* 2003; 18: 524–30.
- Gjedde A, Wong DF, Rosa-Neto P, Cumming P. Mapping neuroreceptors at work: on the definition and interpretation of binding potentials after 20 years of progress. *Int Rev Neurobiol* 2005; 63: 1–20.
- Goetz CG, Tilley BC, Shaftman SR, Stebbins GT, Fahn S, Martinez-Martin P, et al. Movement Disorder Society—sponsored revision of the Unified Parkinson's Disease Rating Scale (MDS-UPDRS): scale presentation and clinimetric testing results. *Mov Disord* 2008; 23: 2129–70.
- Guelfi JD VFR, Caille P. The Norris VAS and the ADA inventory: a factor analysis in outpatients. In: *Proceedings of the VIII World Congress of Psychiatry (Athens 12–19 October 1989)*. Vol 899: *Excerpta Medica International Congress Series* 1989. p. 484.
- Guillin O, Diaz J, Carroll P, Griffon N, Schwartz JC, Sokoloff P. BDNF controls dopamine D3 receptor expression and triggers behavioural sensitization. *Nature* 2001; 411: 86–9.
- Holthoff VA, Beuthien-Baumann B, Kalbe E, Ludecke S, Lenz O, Zundorf G, et al. Regional cerebral metabolism in early Alzheimer's disease with clinically significant apathy or depression. *Biol Psychiatry* 2005; 57: 412–21.
- Houeto JL, Mesnage V, Mallet L, Pillon B, Gargiulo M, Tezenas du Moncel S, et al. Behavioural disorders, Parkinson's disease and subthalamic stimulation. *J Neurol Neurosurg Psychiatry* 2002; 72: 701–7.
- Isella V, Melzi P, Grimaldi M, Piolti R, Ferrarese C, Frattola L, et al. Clinical, neuropsychological, and morphometric correlates of apathy in Parkinson's disease. *Mov Disord* 2002; 17: 366–71.
- Javoy Agid F, Agid Y. Is the mesocortical dopaminergic system involved in Parkinson's disease? *Neurology* 1980; 30: 1326–30.



- Kienast T, Hariri AR, Schlagenhaut F, Wrase J, Sterzer P, Buchholz HG, et al. Dopamine in amygdala gates limbic processing of aversive stimuli in humans. *Nat Neurosci* 2008; 11: 1381–2.
- Kirsch-Darrow L, Fernandez HH, Marsiske M, Okun MS, Bowers D. Dissociating apathy and depression in Parkinson disease. *Neurology* 2006; 67: 33–8.
- Kleiner-Fisman G, Herzog J, Fisman DN, Tamma F, Lyons KE, Pahwa R, et al. Subthalamic nucleus deep brain stimulation: summary and meta-analysis of outcomes. *Mov Disord* 2006; 21 (Suppl 14): S290–S304.
- Krack P, Batir A, Van Blercom N, Chabardes S, Fraix V, Dowsey Limousin P, et al. Five-year follow-up of bilateral stimulation of the subthalamic nucleus in advanced Parkinson's disease. *N Engl J Med* 2003; 349: 1925–34.
- Krack P, Kumar R, Ardouin C, Limousin Dowsey P, McVicker JM, Benabid AL, et al. Mirthful laughter induced by subthalamic nucleus stimulation. *Mov Disord* 2001; 16: 867–75.
- Krack P, Pollak P, Limousin P, Benazzouz A, Deuschl G, Benabid AL. From off-period dystonia to peak-dose chorea: the clinical spectrum of varying subthalamic nucleus activity. *Brain* 1999; 122: 1133–46.
- Krack P, Pollak P, Limousin P, Hoffmann D, Xie J, Benazzouz A, et al. Subthalamic nucleus or internal pallidal stimulation in young onset Parkinson's disease. *Brain* 1998; 121: 451–7.
- Laplante D, Baulac M, Widlocher D, Dubois B. Pure psychic akinesia with bilateral lesions of basal ganglia. *J Neurol Neurosurg Psychiatry* 1984; 47: 377–85.
- Lawrence AD, Evans AH, Lees AJ. Compulsive use of dopamine replacement therapy in Parkinson's disease: reward systems gone awry? *Lancet Neurol* 2003; 2: 595–604.
- Le Jeune F, Drapier D, Bourguignon A, Peron J, Mesbah H, Drapier S, et al. Subthalamic nucleus stimulation in Parkinson disease induces apathy: a PET study. *Neurology* 2009; 73: 1746–51.
- Le Jeune F, Peron J, Biseul I, Fournier S, Sauleau P, Drapier S, et al. Subthalamic nucleus stimulation affects orbitofrontal cortex in facial emotion recognition: a PET study. *Brain* 2008; 131: 1599–608.
- LeDoux J. The emotional brain, fear, and the amygdala. *Cell Mol Neurobiol* 2003; 23: 727–38.
- Lees AJ. The Parkinson chimera. *Neurology* 2009; 72: S2–11.
- Lemke MR, Brecht HM, Koester J, Kraus PH, Reichmann H. Anhedonia, depression, and motor functioning in Parkinson's disease during treatment with pramipexole. *J Neuropsychiatry Clin Neurosci* 2005; 17: 214–20.
- Levy ML, Cummings JL, Fairbanks LA, Masterman D, Miller BL, Craig AH, et al. Apathy is not depression. *J Neuropsychiatry Clin Neurosci* 1998; 10: 314–9.
- Levy R, Dubois B. Apathy and the functional anatomy of the prefrontal cortex-basal ganglia circuits. *Cereb Cortex* 2006; 16: 916–28.
- Leyton M, Boileau I, Benkelfat C, Diksic M, Baker G, Dagher A. Amphetamine-induced increases in extracellular dopamine, drug wanting, and novelty seeking: a PET/[11C]raclopride study in healthy men. *Neuropsychopharmacology* 2002; 27: 1027–35.
- Lim SY, O'Sullivan SS, Kotschet K, Gallagher DA, Lacey C, Lawrence AD, et al. Dopamine dysregulation syndrome, impulse control disorders and punding after deep brain stimulation surgery for Parkinson's disease. *J Clin Neurosci* 2009; 16: 1148–52.
- Liotti M, Mayberg HS, Brannan SK, McGinnis S, Jerabek P, Fox PT. Differential limbic-cortical correlates of sadness and anxiety in healthy subjects: implications for affective disorders. *Biol Psychiatry* 2000; 48: 30–42.
- Logan J, Fowler JS, Volkow ND, Wang GJ, Ding YS, Alexoff DL. Distribution volume ratios without blood sampling from graphical analysis of PET data. *J Cereb Blood Flow Metab* 1996; 16: 834–40.
- Maddock RJ, Garrett AS, Buonocore MH. Posterior cingulate cortex activation by emotional words: fMRI evidence from a valence decision task. *Hum Brain Mapp* 2003; 18: 30–41.
- Mallet L, Schupbach M, N'Diaye K, Remy P, Bardinet E, Czernecki V, et al. Stimulation of subterritories of the subthalamic nucleus reveals its role in the integration of the emotional and motor aspects of behavior. *Proc Natl Acad Sci USA* 2007; 104: 10661–6.
- Maricle RA, Nutt JG, Carter JH. Mood and anxiety fluctuation in Parkinson's disease associated with levodopa infusion: preliminary findings. *Mov Disord* 1995; 10: 329–32.
- Marin RS. Apathy: a neuropsychiatric syndrome. *J Neuropsychiatry Clin Neurosci* 1991; 3: 243–54.
- Mayberg HS, Brannan SK, Tekell JL, Silva JA, Mahurin RK, McGinnis S, et al. Regional metabolic effects of fluoxetine in major depression: serial changes and relationship to clinical response. *Biol Psychiatry* 2000; 48: 830–43.
- Menza MA, Golbe LI, Cody RA, Forman N. Dopamine-related personality traits in Parkinson's disease. *Neurology* 1993; 43: 505–8.
- Menza MA, Mark MH, Burn DJ, Brooks DJ. Personality correlates of [18F]dopa striatal uptake: results of positron-emission tomography in Parkinson's disease. *J Neuropsychiatry Clin Neurosci* 1995; 7: 176–9.
- Migneco O, Benoit M, Koulibaly PM, Dygai I, Bertogliati C, Desvignes P, et al. Perfusion brain SPECT and statistical parametric mapping analysis indicate that apathy is a cingulate syndrome: a study in Alzheimer's disease and nondemented patients. *Neuroimage* 2001; 13: 896–902.
- Moro E, Esselink RJ, Benabid AL, Pollak P. Response to levodopa in parkinsonian patients with bilateral subthalamic nucleus stimulation. *Brain* 2002; 125: 2408–17.
- Naville F. Etudes sur les complications et les séquelles mentales de l'encéphalite épidémique. La bradyphrenie. *Encephale* 1922; 17: 369–75, 423–36.
- Nestler EJ, Carlezon WA Jr. The mesolimbic dopamine reward circuit in depression. *Biol Psychiatry* 2006; 59: 1151–9.
- Nissenbaum H, Quinn NP, Brown RG, Toone B, Gotham AM, Marsden CD. Mood swings associated with the 'on-off' phenomenon in Parkinson's disease. *Psychol Med* 1987; 17: 899–904.
- Norris H. The action of sedatives on brain stem oculomotor systems in man. *Neuropharmacology* 1971; 10: 181–91.
- Nutt JG, Carter JH, Carlson NE. Effects of methylphenidate on response to oral levodopa: a double-blind clinical trial. *Arch Neurol* 2007; 64: 319–23.
- Pedersen KF, Alves G, Bronnick K, Aarsland D, Tysnes OB, Larsen JP. Apathy in drug-naïve patients with incident Parkinson's disease: the Norwegian ParkWest study. *J Neurol* 2010; 257: 217–23.
- Pedersen KF, Larsen JP, Alves G, Aarsland D. Prevalence and clinical correlates of apathy in Parkinson's disease: a community-based study. *Parkinsonism Relat Disord* 2009; 15: 295–9.
- Peters F, Perani D, Herholz K, Holthoff V, Beuthien-Baumann B, Sorbi S, et al. Orbitofrontal dysfunction related to both apathy and disinhibition in frontotemporal dementia. *Dement Geriatr Cogn Disord* 2006; 21: 373–9.
- Rahman S, Griffin HJ, Quinn NP, Jahanshahi M. Quality of life in Parkinson's disease: the relative importance of the symptoms. *Mov Disord* 2008; 23: 1428–34.
- Remy P, Doder M, Lees A, Turjanski N, Brooks D. Depression in Parkinson's disease: loss of dopamine and noradrenaline innervation in the limbic system. *Brain* 2005; 128: 1314–22.
- Rodriguez-Oroz MC, Jahanshahi M, Krack P, Litvan I, Macias R, Bezard E, et al. Initial clinical manifestations of Parkinson's disease: features and pathophysiological mechanisms. *Lancet Neurol* 2009; 8: 1128–39.
- Romito LM, Raja M, Daniele A, Contarino MF, Bentivoglio AR, Barbier A, et al. Transient mania with hypersexuality after surgery for high frequency stimulation of the subthalamic nucleus in Parkinson's disease. *Mov Disord* 2002; 17: 1371–4.
- Saint-Cyr JA, Trépanier LL, Kumar R, Lozano AM, Lang AE. Neuropsychological consequences of chronic bilateral stimulation of the subthalamic nucleus in Parkinson's disease. *Brain* 2000; 123: 2091–108.
- Schlagenhaut F, Juckel G, Koslowski M, Kahnt T, Knutson B, Demberl T, et al. Reward system activation in schizophrenic patients switched from typical neuroleptics to olanzapine. *Psychopharmacology (Berl)* 2008; 196: 673–84.



- Schmidt L, d'Arc BF, Lafargue G, Galanaud D, Czernecki V, Grabli D, et al. Disconnecting force from money: effects of basal ganglia damage on incentive motivation. *Brain* 2008; 131: 1303–10.
- Schultz W. Predictive reward signal of dopamine neurons. *J Neurophysiol* 1998; 80: 1–27.
- Schweri MM, Skolnick P, Rafferty MF, Rice KC, Janowsky AJ, Paul SM. [3H]Threo-(+/-)-methylphenidate binding to 3,4-dihydroxyphenylethylamine uptake sites in corpus striatum: correlation with the stimulant properties of ritalinic acid esters. *J Neurochem* 1985; 45: 1062–70.
- Shiba M, Bower JH, Maraganore DM, McDonnell SK, Peterson BJ, Ahlskog JE, et al. Anxiety disorders and depressive disorders preceding Parkinson's disease: a case-control study. *Mov Disord* 2000; 15: 669–77.
- Simpson JR Jr, Drevets WC, Snyder AZ, Gusnard DA, Raichle ME. Emotion-induced changes in human medial prefrontal cortex: II. During anticipatory anxiety. *Proc Natl Acad Sci USA* 2001; 98: 688–93.
- Smeding HM, Goudriaan AE, Foncke EM, Schuurman PR, Speelman JD, Schmand B. Pathological gambling after bilateral subthalamic nucleus stimulation in Parkinson disease. *J Neurol Neurosurg Psychiatry* 2007; 78: 517–9.
- Smeding HMM, Speelman JD, Koning-Haanstra M, Schuurman PR, Nijssen P, Van Laar T, et al. Neuropsychological effects of bilateral STN stimulation in Parkinson disease. *Neurology* 2006; 66: 1830–6.
- Stacy M, Bowron A, Guttman M, Hauser R, Hughes K, Larsen JP, et al. Identification of motor and nonmotor wearing-off in Parkinson's disease: comparison of a patient questionnaire versus a clinician assessment. *Mov Disord* 2005; 20: 726–33.
- Stacy MA, Murck H, Kroenke K. Responsiveness of motor and nonmotor symptoms of Parkinson disease to dopaminergic therapy. *Prog Neuropsychopharmacol Biol Psychiatry* 2010; 34: 57–61.
- Starkstein SE, Leentjens AF. The nosological position of apathy in clinical practice. *J Neurol Neurosurg Psychiatry* 2008; 79: 1088–92.
- Starkstein SE, Mayberg HS, Preziosi TJ, Andrezejewski P, Leiguarda R, Robinson RG. Reliability, validity, and clinical correlates of apathy in Parkinson's disease. *J Neuropsychiatry Clin Neurosci* 1992; 4: 134–9.
- Starkstein SE, Merello M, Jorge R, Brockman S, Bruce D, Power B. The syndromal validity and nosological position of apathy in Parkinson's disease. *Mov Disord* 2009; 24: 1211–6.
- Steeves TD, Miyasaki J, Zurowski M, Lang AE, Pellecchia G, Van Eimeren T, et al. Increased striatal dopamine release in Parkinsonian patients with pathological gambling: a [11C] raclopride PET study. *Brain* 2009; 132: 1376–85.
- Temel Y, Tan S, Vlamings R, Sesia T, Lim LW, Lardeux S, et al. Cognitive and limbic effects of deep brain stimulation in preclinical studies. *Front Biosci* 2009; 14: 1891–901.
- Thobois S. Proposed dose equivalence for rapid switch between dopamine receptor agonists in Parkinson's disease: a review of the literature. *Clin Ther* 2006; 28: 1–12.
- Thobois S, Vingerhoets F, Fraix V, Xie Brustolin J, Mollion H, Costes N, et al. Role of the dopaminergic treatment in dopamine receptor downregulation in advanced Parkinson's disease: a C-raclopride PET study. *Arch Neurol* 2004; 61: 1709.
- Tolosa E, Gaig C, Santamaria J, Compta Y. Diagnosis and the premotor phase of Parkinson disease. *Neurology* 2009; 72: S12–20.
- Tomer R, Aharon-Peretz J. Novelty seeking and harm avoidance in Parkinson's disease: effects of asymmetric dopamine deficiency. *J Neurol Neurosurg Psychiatry* 2004; 75: 972–5.
- Troster AI. Neuropsychology of deep brain stimulation in neurology and psychiatry. *Front Biosci* 2009; 14: 1857–79.
- Ulla M, Thobois S, Lemaire JJ, Schmitt A, Derost P, Broussolle E, et al. Manic behaviour induced by deep-brain stimulation in Parkinson's disease: evidence of substantia nigra implication? *J Neurol Neurosurg Psychiatry* 2006; 77: 1363–6.
- Vezina P, Leyton M. Conditioned cues and the expression of stimulant sensitization in animals and humans. *Neuropharmacology* 2009; 56 (Suppl 1): 160–8.
- Villemagne VL, Wong DF, Yokoi F, Stephane M, Rice KC, Matecka D, et al. GBR12909 attenuates amphetamine-induced striatal dopamine release as measured by [(11)C]raclopride continuous infusion PET scans. *Synapse* 1999; 33: 268–73.
- Vogt B, Hof P, Vogt L. Cyngulate gyrus. In: Paxinos G, Mai JK, editors. *The human nervous system*. 2nd edn., San Diego, CA: Academic Press; 2003. p. 915–49.
- Volkow ND, Fowler JS, Wang GJ, Baler R, Telang F. Imaging dopamine's role in drug abuse and addiction. *Neuropharmacology* 2009; 56 (Suppl 1): 3–8.
- Volkow ND, Wang GJ, Fowler JS, Gatley SJ, Logan J, Ding YS, et al. Dopamine transporter occupancies in the human brain induced by therapeutic doses of oral methylphenidate. *Am J Psychiatry* 1998; 155: 1325–31.
- Voon V, Fernagut PO, Wickens J, Baunez C, Rodriguez M, Pavon N, et al. Chronic dopaminergic stimulation in Parkinson's disease: from dyskinesias to impulse control disorders. *Lancet Neurol* 2009; 8: 1140–9.
- Voon V, Krack P, Lang AE, Lozano AM, Dujardin K, Schupbach M, et al. A multicentre study on suicide outcomes following subthalamic stimulation for Parkinson's disease. *Brain* 2008; 131: 2720–8.
- Voon V, Kubu C, Krack P, Houeto JL, Troster AI. Deep brain stimulation: neuropsychological and neuropsychiatric issues. *Mov Disord* 2006; 21 (Suppl 14): S305–27.
- Weintraub D. Dopamine and impulse control disorders in Parkinson's disease. *Ann Neurol* 2008; 64 (Suppl 2): S93–100.
- Wise RA. Roles for nigrostriatal—not just mesocorticolimbic—dopamine in reward and addiction. *Trends Neurosci* 2009; 32: 517–24.
- Witjas T, Baunez C, Henry JM, Delfini M, Regis J, Cherif AA, et al. Addiction in Parkinson's disease: impact of subthalamic nucleus deep brain stimulation. *Mov Disord* 2005; 20: 1052–5.
- Witjas T, Kaphan E, Azulay JP, Blin O, Ceccaldi M, Pouget J, et al. Nonmotor fluctuations in Parkinson's disease: frequent and disabling. *Neurology* 2002; 59: 408–13.
- Witt K, Daniels C, Reiff J, Krack P, Volkmann J, Pinski MO, et al. Neuropsychological and psychiatric changes after deep brain stimulation for Parkinson's disease: a randomised, multicentre study. *Lancet Neurol* 2008; 7: 605–14.
- Wu JC, Bell K, Najafi A, Widmark C, Keator D, Tang C, et al. Decreasing striatal 6-FDOPA uptake with increasing duration of cocaine withdrawal. *Neuropsychopharmacology* 1997; 17: 402–09.
- Yahr MD, Duvoisin RC, Schear MJ, Barrett E, Hoehn MN. Treatment of parkinsonism with levodopa. *Arch Neurol* 1969; 21: 343–54.
